## Profiling Human CMV-specific T cell responses reveals novel immunogenic ORFs

1 Rekha Dhanwani<sup>1†</sup>, Sandeep Kumar Dhanda<sup>1#</sup>, John Pham<sup>1</sup>, Gregory P. Williams<sup>1</sup>,  
2 John Sidney<sup>1</sup>, Alba Grifoni<sup>1</sup>, Gaelle Picarda<sup>1,3</sup>, Cecilia S. Lindestam Arlehamn<sup>1</sup>,  
3 Alessandro Sette<sup>1,2,\*</sup>, Chris A Benedict<sup>1,3,\*</sup>

4

5 <sup>1</sup> Center for Infectious Disease and Vaccine Research, La Jolla Institute for Immunology,  
6 La Jolla, CA 92037, USA

7 <sup>2</sup> Department of Medicine, University of California San Diego, La Jolla, CA 92093, USA

8 <sup>3</sup>Center for Autoimmunity and Inflammation, La Jolla Institute for Immunology, La Jolla,  
9 CA 92037, USA

10 † Present Address: Division of Extramural Activities, National Institute of Allergy and  
11 Infectious Diseases, National Institute of Health, Rockville, MD 20852, USA

12 # Present Address: St. Jude Children's Research Hospital, Arlington, VA 22203

13

14 \* Corresponding authors

15 Alessandro Sette

16 Email: [alex@lji.org](mailto:alex@lji.org)

17

18 Chris A. Benedict

19 Email: [benedict@lji.org](mailto:benedict@lji.org)

20

21

22 **Abstract**

23 Despite the prevalence and medical significance of human cytomegalovirus (HCMV)  
24 infections, a systematic analysis of the targets of T cell recognition in humans that spans  
25 the entire genome and includes recently described potential novel ORFs is not available.  
26 Here, we screened a library of epitopes predicted to bind HLA class II that spans over  
27 350 different HCMV ORFs and includes ~150 previously described and ~200 recently  
28 described potential novel ORFs using an ex vivo IFN $\gamma$  fluorospot assay. We identified 235  
29 unique HCMV specific epitopes derived from 100 ORFs, some previously described as  
30 immunodominant and others that were not previously described to be immunogenic. Of  
31 those, 41 belong to the set of recently reported novel ORFs, thus providing evidence that  
32 at least some of these are actually expressed *in vivo* in humans. These data reveal that  
33 the breadth of the human T cell response to HCMV is much greater than previously  
34 thought. The ORFs and epitopes identified will help elucidate how T cell immunity relates  
35 to HCMV pathogenesis and instruct ongoing HCMV vaccine research.

36

37 **Importance**

38 To understand the crucial role of adaptive immunity in controlling cytomegalovirus  
39 infection and disease, we systematically analyzed the CMV 'ORFeome' to identify new  
40 CMV epitopes targeted primarily by CD4 T cells in humans. Our study identified >200  
41 new T cell epitopes derived from both canonical and novel ORFs, highlighting the  
42 substantial breadth of anti-CMV T cell response and providing new targets for vaccine  
43 design.

44

## 45 **Introduction**

46 Human cytomegalovirus (HCMV, HHV-5) is a  $\beta$ -herpesvirus that infects the  
47 majority of the world's population. Infection in healthy individuals is characterized by a  
48 primary asymptomatic phase followed by the establishment of lifelong persistence/latency  
49 in several cell types (1, 2). HCMV's 236 kbp double stranded DNA genome facilitates its  
50 persistence and reactivation when immunity is compromised, with both viral and cellular  
51 proteins controlling viral gene expression and regulating the dynamic and reversible  
52 latent-lytic cycle that develops over a lifelong infection (3, 4). Although largely persistent,  
53 its reactivation in immunocompromised populations, such as transplant recipients and  
54 AIDS patients, causes severe disease outcomes (5-11). Congenital infection in the  
55 developing fetus is also the leading infectious cause of birth defects (12-18). Moreover,  
56 the available antiviral drug therapies are insufficient and often toxic in young children (19-  
57 22). Consequently, HCMV is recognized as a major public health problem and  
58 development of a vaccine that prevents or at least mitigates virus-induced disease is a  
59 top priority (23-25) .

60 Although both humoral and cell mediated immune responses protect against  
61 HCMV infection, a considerable effort has been made towards identifying HCMV targets  
62 of CTL responses due to their pivotal role in controlling HCMV disease in  
63 immunocompromised individuals (26-29). However, HCMV targets of CD4+ T helper  
64 cells, which amplify CTL and antibody responses or may mediate direct antiviral activity  
65 themselves, remain to be explored in detail. In order to develop a successful HCMV  
66 vaccine, it is imperative to assess the large number of candidate viral proteins for their  
67 potential to induce robust CD4+ T cell responses.

68 Previous work from Sylwester et al. extensively characterized the canonical HCMV  
69 proteins that are targeted by CD4+ and CD8+ T cell responses (30), and work by many  
70 other groups have identified immunodominant epitopes derived from these that include  
71 the 65kDA phosphoprotein (UL83/pp65), immediate early protein 1 (UL123), tegument  
72 protein pp150 (UL32), envelope glycoprotein B (UL55), viral transcription factor IE2  
73 (UL122), and major capsid protein (UL86) (31-38). However, a comprehensive analysis  
74 of HCMV epitope-specific T cell responses has been challenging, mainly due to the large  
75 size of virus and the evolving impact that persistent infection has on the memory pool.  
76 Stern-Ginossar et al. recently reported all the HCMV RNAs found to be associated with  
77 ribosomes in infected fibroblasts, increasing the potential number of ORFs the virus may  
78 encode by ~3 fold (39). Here, we designed a comprehensive screening approach to  
79 assess potential T cell responses against 563 of these ORFs, which included both  
80 previously reported and potentially novel HCMV proteins. 2593 15-mer peptides were  
81 predicted using computational algorithms, and a high throughput screen was performed  
82 using an IFN $\gamma$  fluorospot assay to identify epitopes targeted by both CD8+ and CD4+ T  
83 cells in healthy HCMV-infected adults. This 'whole ORFeome' approach resulted in the  
84 identification of more than 200 new CD4+ and CD8+ T cell epitopes.

85

86

## 87 **Results**

### 88 **Targets of HCMV T cell reactivity**

89 To define the epitopes targeted by HCMV-specific T cell responses in healthy  
90 adults, we screened PBMCs of 19 subjects, 10 males and 9 females, recruited from the  
91 San Diego blood bank (SDBB). The HCMV seropositivity of all the subjects was confirmed  
92 by IgG ELISA (**Fig. S1A**). We tested a total of 2593 15-mer HCMV peptides covering a  
93 total of 563 ORFs (39). Removing the predicted ORFs that were located entirely within  
94 longer ORFs resulted in a set of 359 completely unique ORFs. This set consists of  
95 approximately 150 “canonical” ORFs, with an additional 200 identified by ribosomal RNA  
96 profiling (39). These 15-mer peptides corresponded to epitopes likely to be dominant  
97 based on a bioinformatic method that predicts promiscuous binding to HLA class II  
98 molecules (40). Each ORF analyzed contained a minimum of 2 predicted epitopes, with  
99 the exception of very small ORFs of less than 15-20 amino acid residues, in which case  
100 at least one peptide was synthesized. The 2593 peptides were arranged in 89 pools of  
101 28 to 30 15-mers. The PBMC reactivity of each of the 89 pools was assayed directly *ex*  
102 *vivo* using an IFN- $\gamma$  Fluorospot assay. After identifying the pools that resulted in IFN- $\gamma$   
103 production in HCMV+ individuals, the top 10 most reactive pools (that, on average,  
104 accounted for more than 90% of the reactivity observed within each subject) were then  
105 deconvoluted to identify the specific epitopes (**Fig. S2**). Representative results from the  
106 initial screening and the deconvolution of a pool in a representative subject are shown in  
107 **Fig. 1A-B**. In conclusion, the results shown here indicate that human T cell responses to  
108 HCMV recognize a wide breadth of different epitope specificities.

109

## 110 **Characterization of CMV epitope-specific immune responses**

111 The deconvolution of the top 10 pools from each subject identified widespread  
112 reactivity directed against 235 unique epitopes (**Fig. S3 and Table 1**). Interestingly,  
113 females tended to show both a higher frequency and magnitude of epitope-specific  
114 responses when compared to males, although this did not reach statistical significance  
115 (**Fig. S4**). On average, each subject recognized 25 epitopes (**Fig. 2A**) and all subjects  
116 recognized at least 2 (range 2-57, **Fig. 2B**). Specifically, 6 out of 19 donors recognized  
117 21-30 epitopes. A quarter of the epitopes (58 of the 235 recognized) were recognized by  
118 three or more subjects (**Fig. 2C**), and these accounted for 76% of the total T cell response  
119 (**Fig. 2D**).

120 We further characterized the phenotype of the T cell responses directed against  
121 these 58 dominant epitopes by intracellular IFN- $\gamma$  staining (representative results shown  
122 in **Fig. 3A**, with the flow cytometry gating strategy shown in **Fig. S5A**). In the majority of  
123 tested subjects, the responding T cells were CD4+. More specifically, 68% of all  
124 responding T cells were CD4+ and 13% contained both IFN- $\gamma$ + CD4+ and CD8+. In 18%  
125 of the cases, only CD8+ T cells responded to these 58 epitopes (**Fig. 3B**). Similarly, if the  
126 magnitude of the response was considered, 70% of the IFN- $\gamma$  response was attributable  
127 to CD4+ T cells and only 30% emanated from CD8+ T cells (**Fig. 3C**). The fact that the  
128 responses were dominated by CD4+ T cells is consistent with the fact that the peptides  
129 tested were originally selected based on their predicted likelihood to bind HLA class II  
130 alleles. In turn, the occasional identification of epitope-specific CD8+ T cell responses in  
131 many cases likely reflects class I epitopes nested within the 15-mer epitopes tested in the

132 screen. Overall, these results indicate that, as expected, the screening strategy employed  
133 mostly identifies targets of CD4+ T cell reactivity.

#### 134 **Analysis of the ORF of origin of the identified epitopes**

135 The 235 epitopes identified mapped to a total of 100 of the 359 unique ORFs  
136 screened. Of those, 28 ORFs contained >3 immunogenic peptides and 18 ORFs were  
137 recognized in 15% or more of the donors (**Fig. 4**). Notably, the previously well-  
138 characterized immunodominant ORFs such as envelope glycoprotein B (UL55), IE1  
139 (UL123), tegument protein pp65 (UL83), major capsid protein UL86, IE2 (UL122), and  
140 pp150 (UL32) were amongst those associated with more than three immunogenic  
141 peptides.

142 To address the novelty of our findings, we compared our results with ORFs that  
143 have already been reported and curated in the Immune Epitope Database (IEDB  
144 <http://www.iedb.org>) (41), as a source of defined epitopes. Specifically, a query of the  
145 IEDB in October 2020 for previously characterized targets of T cell responses tested in  
146 at least 19 donors and with a minimum response frequency of 15% revealed 7 ORFs that  
147 match the conditions of our screening results: UL83/pp65 (ORFL205C), UL123/IE1  
148 (ORFL264C), UL122/IE2 (ORFL265C), UL55/gB (ORFL145C), UL32/pp150 (ORFL92C),  
149 UL40 (ORFL105C) and UL98 (ORFL229W) (**Fig. 4**).

150 The same query revealed three additional ORFs that were not identified in our  
151 screen. These ORFs were associated with a limited number of literature-reported and  
152 IEDB curated epitopes: UL75/gH (ORFL184C; 1 epitope), UL44/DNA-pol  
153 (ORFL112C.iORF1; 3 epitopes) and UL138 (ORFL313C; 1 epitope). Importantly, our

154 screen identified 93 ORFs that were not previously described as targets of T cell  
155 responses (**Fig. 5**).

156 Notably, 52 of these 93 ORFs were already described in the ‘canonical HCMV’  
157 annotated genome, but not all have been described as targets of human T cell responses.  
158 Even more strikingly, 41 of these 93 ORFs corresponded to those viral mRNAs only  
159 identified by recent ribosomal profiling studies (39), providing evidence that they are  
160 translated in HCMV infected cells. These results indicate that our approach successfully  
161 re-identified known ORFs as targets of T cell responses, and perhaps most importantly,  
162 greatly expanded the repertoire of canonical and ‘novel’ ORFs recognized by T cells in  
163 healthy adults.

#### 164 **Novel identified epitope pools elicit antigen specific CD4+ T cell responses.**

165 Lastly, we wanted to explore whether the epitopes identified in the presented study  
166 could, alone or in combination with previously described epitopes, be utilized to generate  
167 epitope “MegaPools” (MP) (42-46) to allow detection of CMV-specific CD4 T cell  
168 responses. Accordingly, we generated a ‘P235’ MP encompassing the 235 CMV epitopes  
169 identified in the present study. As a comparison, we considered the commercially  
170 available CMV peptide pool (Mabtech, catalog 3619-1) encompassing a total of 42 CD4  
171 and CD8 epitopes. Additionally, we synthesized a MP of known class II epitopes curated  
172 in the IEDB database, encompassing a total of 187 CD4 epitopes (IEDB-II, Table 2).

173 These MPs were tested with PBMC from a new cohort of 20 individuals (6 males  
174 and 14 females), which included both HCMV seropositive and seronegative donors (10  
175 CMV<sup>+</sup> and 10 CMV<sup>-</sup>, **Fig. S1B** for IgG ELISA CMV confirmation). None of the PBMC from  
176 these subjects were used in the original epitope mapping experiments. PBMCs were



177 stimulated with the Mabtech, P235, IEDB-II, or a combination of both P235/ IEDB-II MPs.  
178 CD4+ T cell responses were measured as percentage of activation-induced marker assay  
179 positive (OX40+ CD137+) CD4+ T cells and results are displayed in **Fig. 6** (flow cytometry  
180 gating strategy shown in **Fig. S5B**).

181 All HCMV MPs tested were associated with significantly higher CD4 AIM  
182 responses in HCMV+ individuals compared to HCMV- subjects as shown in **Fig. 5**  
183 (statistical differences detailed in figure legend). When comparing AIM responses  
184 between the HCMV pools, the P235, IEDB-II and P235/IEDB-II MPs were associated with  
185 significantly higher HCMV-specific CD4 responses compared to the Mabtech pool  
186 (geometric mean 0.15% vs 0.25% CD4 AIM+,  $p=0.01$ ; and 0.15% vs 0.36%,  $p=0.004$ ,  
187 and 0.15% vs 0.46% CD4 AIM+,  $p=0.004$ , respectively by Wilcoxon test). This was  
188 expected, as the Mabtech pool contains fewer epitopes which are also mainly CD8 T cell  
189 specific. Additionally, the combination of the P235 and IEDB-II MPs elicited higher CD4  
190 responses than either MP alone (geometric mean 0.25% vs 0.46% CD4 AIM+,  $p=0.0078$   
191 and 0.36% vs 0.46% CD4 AIM+,  $p=0.004$ , respectively by Wilcoxon test) and had the  
192 highest magnitude response of all pools tested. This indicates that the combination of  
193 known (IEDB-II MP) and novel epitopes and ORFs (P235 MP) can capture the broadest  
194 range of CD4 T-cell responses in HCMV+ individuals, which has high potential for clinical  
195 diagnostic use.

196

197

198

## 199 **Discussion**

200           In this study we have identified >200 new epitopes derived from 100 HCMV ORFs  
201 that induce virus-specific T cell responses. Importantly, this demonstrates that the current  
202 HLA peptide-binding prediction algorithms that we and others have refined over the last  
203 several decades are extremely efficient (47-51), and represent an excellent alternative to  
204 synthesizing genome-wide overlapping peptides, especially for large pathogens such as  
205 HCMV. Despite the significant diversity in the human HLA repertoire, current advances in  
206 algorithm-based epitope identification take into consideration epitopes with potential  
207 binding to diverse haplotypes, which undoubtedly contributed to this success (40, 52).  
208 Together, this approach allowed us to increase the known T cell epitope landscape for  
209 HCMV by greater than 10-fold by synthesizing only 2593 peptides, illustrating both its  
210 efficiency and cost effectiveness in deciphering immune targets of large pathogens.

211           We chose to use IFN- $\gamma$  production as a readout for positive epitope reactivity in a  
212 fluorospot-based assay to identify HCMV-specific T cell epitopes in this study. As true for  
213 most viral infections, CMV drives a strong Th1-like CD4<sup>+</sup> response, and most effector  
214 and memory viral CD8<sup>+</sup> T cells also produce this cytokine (53). However, future studies  
215 assessing which of these 235 epitopes may elicit HCMV-specific CD4 T cells to produce  
216 other cytokines are merited. Previously, we have observed that Dengue virus epitope-  
217 specific CD4<sup>+</sup> T cells can produce both IFN $\gamma$  and IL-10 (54), something we have also  
218 seen during acute CMV infection in mice (55), where IL-10 producing CD4<sup>+</sup> T cells  
219 enhance the duration of viral persistence (56). Recent studies by the Wills and Moss  
220 groups show that subsets of HCMV epitope-specific CD4<sup>+</sup> T cells can produce IL-10 and  
221 also display cytolytic markers (57, 58). The potential CTL activity of HCMV-specific CD4<sup>+</sup>

222 T cells has been postulated for many years (59), and our recent results showing that CMV  
223 epitope-specific CD4 T cells can directly kill *in vivo* support this hypothesis (60). Taken  
224 together, our identification of >200 new T cell epitopes that elicit IFN $\gamma$  production in this  
225 study provide us and others in the field valuable new tools to dissect the phenotypes and  
226 effector functions of HCMV-specific CD4 T cells in cases of both healthy and immune  
227 compromised patients, and will also help instruct ongoing vaccine efforts.

228         Of the 100 ORFs which we show here to be sources of specific T cell epitopes, 41  
229 were uniquely identified as ribosome-bound RNAs in HCMV infected fibroblasts (39), with  
230 these 41 yielding 50 unique epitopes. Notably, of these 41 ORFs, 17 are predicted to  
231 produce proteins <50 amino acids in length, and 7 contain non-ATG start codons. This is  
232 consistent with recent studies suggesting that the short/‘cryptic’ mRNAs present in both  
233 virally infected and tumor cells can be translated, proteolytically processed and loaded  
234 onto HLA molecules, resulting in the induction of epitope-specific T cell responses (61-  
235 63). Interestingly, one of the larger 41 ORFs that contains two newly identified T cell  
236 epitopes (ORFL147C, 476 amino acids) has very recently been shown to regulate RNA  
237 binding/processing, and its deletion compromises CMV replication in fibroblasts (64).  
238 Despite >20% of the novel T cell epitopes identified here being derived from these newly  
239 described, ribosome-associated HCMV RNAs, no more than 2 of the 19 healthy donors  
240 analyzed produce T cells specific for any single one of these epitopes. This indicates that  
241 these novel ORFs 1) may not be broad targets of T cell responses in infected persons, 2)  
242 that specific individuals may more efficiently present epitopes derived from short/cryptic  
243 HCMV RNAs or 3) that minor HLA molecules may present them, with other possibilities  
244 also existing. Additionally, whether the proteins derived from these short ORFs are stable

245 and play a role in the HCMV lifecycle remains an open question. Finally, we also identified  
246 24 epitopes derived from 14 'canonical' HCMV ORFs where the only historic support for  
247 their existence was the presence of their RNA in infected cells or bioinformatic analyses.  
248 Notably, a recent comprehensive study where 169 predicted canonical HCMV proteins  
249 (including these 14) were epitope-tagged, expressed stably in infected cells,  
250 immunoprecipitated and analyzed for interacting proteins by mass spectrometry supports  
251 our results that these ORFs are expressed as proteins (64).

252 Of the 59 canonical ORFs that we have identified here to contain T cell epitopes,  
253 >25% of these are known to function as immunomodulatory proteins (65). This is  
254 intriguing, as perhaps these HCMV proteins are more subject to being localized to  
255 antigen-processing or presentation compartments within infected cells. One of these  
256 epitopes is derived from the HCMV IL-10 orthologue, which is being considered as a  
257 potential HCMV vaccine candidate (66, 67). Additionally, 3 epitopes were found to be  
258 embedded within the viral UL128 protein, a critical component of the pentameric envelope  
259 protein complex (UL128-131/gH/gL) that mediates entry of HCMV into non-fibroblast cell  
260 types (68, 69). This is also of high potential interest in the context of vaccine development,  
261 as many believe the pentamer should be included in a viral- or subunit-based approach  
262 (70). Notably, both vIL-10 and UL128 have largely been considered only in the context of  
263 their abilities to induce antibody-based vaccine protection, but our identification of T cell  
264 epitopes derived from both these HCMV proteins suggests they may function to prime  
265 both humoral and cellular immunity.

266

267 **Methods**

268 **Study design**

269 For the initial CMV ORF screen, the responses of 19 CMV-seropositive subjects  
270 were evaluated. PBMCs were stimulated with 89 pools covering 563 ORFs of HCMV.  
271 Each pool comprised of 28-30 15-mer peptides overlapping by 10 residues. PBMCs that  
272 were found reactive to a pool were further tested against individual peptides contained in  
273 the pool using IFN- $\gamma$  Fluorospot assay. Flow cytometry was then used to further  
274 characterize the epitopes recognized by PBMCs stimulated with individual peptides by  
275 detecting IFN- $\gamma$  production from CD8+ and CD4+ T cells.

276 For the CMV-235 validation and comparison screen, the responses of a new cohort  
277 consisting of 10 CMV-seropositive and 10 seronegative subjects were evaluated. PBMCs  
278 were stimulated with CMV-Mabtech peptide pool (Catalog 3619-1), CMV-IEDB peptide  
279 pool (Table 2) (44, 46), CMV-235 pool, or a combination of both CMV-IEDB and CMV-  
280 235 pools. PBMC responses were assayed using the same IFN- $\gamma$  Fluorospot assay.  
281 These studies were approved by the institutional review board committee at La Jolla  
282 Institute protocol number: VD-112 and VD-174.

283 **Subjects**

284 19 subjects (10 males and 9 females) were recruited anonymously from San Diego  
285 blood bank (SDBB) for the initial CMV ORF screens. For the CMV-235 comparison  
286 screens, samples from 20 subjects (6 males and 14 females) were obtained by La Jolla  
287 Institute Clinical Core and Continental Services Group (Miami, FL) for prior, unrelated  
288 studies. Blood samples were collected by trained staff. At the time of enrollment in the  
289 initial studies, all individual subjects provided informed consent that any leftover sample  
290 could be used for future studies, which includes this study. These subjects were

291 considered healthy as defined by no known history of any significant systemic diseases  
292 (not limited to autoimmune disease, diabetes, kidney or liver disease, congestive heart  
293 failure, malignancy, coagulopathy, hepatitis B or C, or HIV). The demographics of those  
294 subjects are provided in **Table 3**.

295 The IgG antibodies of the subjects for both cohorts were measured using  
296 Cytomegalovirus IgG Elisa kit from Genway Biotech Inc. according to manufacturer's  
297 instructions.

### 298 **Peptide prediction**

299 Based on the 7-allele method as previously described (40), 2593 peptides were  
300 predicted for 563 potential HCMV ORFs. Of the 751 ORFs predicted by ribosomal  
301 profiling (39), those smaller than 15 amino acids were excluded, and only one peptide of  
302 ORFs 15-20 amino acids in length were selected for screening.

### 303 **Peptide libraries and pool preparation**

304 The predicted peptides were commercially synthesized as crude material by TC  
305 Peptide Lab ([www.tcpeptidelab.com](http://www.tcpeptidelab.com); San Diego, CA). The peptides were solubilized in  
306 DMSO at a concentration of 20 mg/ml and spot checked for quality by mass spectrometry.  
307 The peptides were pooled into peptide pools containing 28-30 peptides constituting  
308 multiple ORFs per pool. A total of 89 pools were prepared covering 563 ORFs of HCMV.  
309 The final concentration of each pool was 0.7 mg/ml.

310 For the IEDB-II (Table 2) and P235 (Table 1) peptide pools peptides were  
311 synthesized by A&A Ltd, San Diego, resuspended in DMSO, pooled and sequentially  
312 lyophilized as previously described (71). The IEDB-II peptide pool was developed based  
313 on data available in the IEDB ([www.iedb.org](http://www.iedb.org)) (41). The MHC class II restricted epitopes

314 for CMV was extracted from the IEDB in October of 2020 using the following query;  
315 Organism: human herpesvirus 5 (ID:10359), positive assays only, no B cell assays, MHC  
316 restriction type: class II, host: *Homo sapiens*. The resulting 187 epitopes (table 2) were  
317 filtered for size (13-20 amino acids) and discovered using one of the following assays:  
318 ELISPOT, ICS, multi- or tetramers, proliferation and “helper response”. The CMV peptide  
319 pool for human CD4 and CD8 T cells containing 42 peptides (14 MHC class II restricted  
320 and 28 MHC class I restricted) representing pp50, pp65, IE1, IE2, and envelope  
321 glycoprotein B was purchased from Mabtech.

### 322 **Isolation of PBMC by Ficoll-Paque density gradient centrifugation**

323 One-unit blood from each donor was processed for PBMC isolation. Briefly, blood  
324 was centrifuged and the top layer of plasma was removed. The remaining blood was  
325 diluted and layered over 15 ml of Ficoll-Paque. Tubes were spun at room temperature in  
326 a swinging bucket rotor without brake applied. The PBMC interface was carefully removed  
327 by pipetting and washed with PBS by centrifugation at 800 rpm for 10 mins with brakes  
328 off. PBMC pellet was resuspended in RPMI media, cell number and viability were  
329 determined by trypan blue staining and cells were cryopreserved in liquid nitrogen in  
330 freezing media (90% Fetal bovine serum and 10% DMSO) at a density of 30 million/ml  
331 and stored until further processed.

### 332 **Fluorospot assay**

333 PBMC were thawed, washed and counted for viability using the trypan blue  
334 exclusion method. 200,000 cells were plated in triplicates and stimulated with pools  
335 (2µg/ml) or peptides (10µg/ml), PHA (10µg/ml) or medium containing equivalent amount  
336 of DMSO in 96- well plates (Immubilion-P, Millipore) previously coated with anti IFN-γ

337 antibody (1-D1K, Mabtech, Stockholm, Sweden). After 20 hr incubation at 37°C, cells  
338 were discarded and wells were washed six times with PBS/0.05% Tween 20 using an  
339 automated plate washer and further incubated with IFN- $\gamma$  antibody (7-B6-1-FS-BAM) for  
340 2 hrs at room temperature. After incubation, wells were washed and incubated with  
341 fluorophore conjugated anti-BAM-490 antibody for 1 hr at room temperature. Finally, the  
342 plates were washed and incubated with fluorescence enhancer for 15 min, blotted dry  
343 and fluorescent spots were counted by computer assisted image analysis (IRIS  
344 Fluorospot reader, Mabtech, Sweden).

345 Each pool or peptide was considered positive compared to the background that  
346 had equivalent amount of DMSO based on the following criteria: (i) 20 or more spot  
347 forming cells (SFC) per  $10^6$  PBMC after background subtraction, (ii) the stimulation index  
348 greater than 2, and (iii)  $p < 0.05$  by student's t test or Poisson distribution test when  
349 comparing the peptide or pool triplicates with the negative control triplicate.

#### 350 **Intracellular cytokine assay for IFN- $\gamma$**

351 Intracellular staining for IFN- $\gamma$  and flow cytometry was performed to detect antigen  
352 specific T cell responses.  $1 \times 10^6$  PBMCs suspended in RPMI medium supplemented with  
353 1-% heat inactivated human AB serum, glutamine and penicillin streptomycin were plated  
354 in U-bottom 96 well plates. After overnight resting at 37°C, PBMCs were spun and  
355 replaced with fresh RPMI media and stimulated with individual peptides at a concentration  
356 of 10  $\mu\text{g/ml}$ . PHA at a concentration of 5  $\mu\text{g/ml}$  was used as a positive control. After 1 hr  
357 of incubation at 37°C, 2 $\mu\text{g/ml}$  of Brefeldin was added and cell were further incubated at  
358 37°C for additional 5 hrs. The cells were then harvested, washed with 200  $\mu\text{l}$  of MACS  
359 Buffer and stained with a cocktail of antibodies that contained CD3-Af700 (eBioscience,



360 clone UCHT1), CD4-APCef780 (eBioscience, clone RPA-T4), CD8-BV650 (Biolegend,  
361 clone RPA-T8), CD14-V500 (BD Biosciences, clone M5E2), CD19-V500 (BD  
362 Biosciences, clone HIB19), and fixable viability dye-e506 for 30 min at 4°C. The cells  
363 were then washed thrice with 200 µl MACS buffer, fixed using 4% PFA for 10 mins at 4°C,  
364 washed with 200 µl PBS and rested at 4°C overnight in 200 µl MACS buffer. The following  
365 day, cells were washed, permeabilized by washing with 200 µl saponin buffer (0.5 %  
366 saponin in PBS), washed with blocking buffer (10% human serum prepared in saponin  
367 buffer) and stained with IFN- $\gamma$ -FITC (eBioscience, clone 4S.B3) antibody at room  
368 temperature for 30 mins. The cells were finally washed with PBS and suspended in 200  
369 µl PBS.

370 The cells were acquired on ZE5 Biorad plate reader and further analysis was done  
371 on FlowJo software. Gates were applied on live single cells for CD3+, CD4+ and CD8+ T  
372 cell populations. The percentage of reactive CD4+ or CD8+ IFN- $\gamma$  T cells were expressed  
373 as a percent of the total number of parent population analyzed. Reactive populations met  
374 the following 2 criteria: (i) well-defined cell population positive for both IFN- $\gamma$  and CD4 or  
375 CD8 constituting at least 0.02% (post subtracting their corresponding DMSO controls) of  
376 the total number of CD4+ or CD8+ cells analyzed (ii) stimulation index greater than 2.

### 377 **Activation induced marker (AIM) assay**

378 PBMC were thawed, washed and counted for viability using the trypan blue  
379 exclusion method. 1 million cells per donor/condition were plated and cultured in the  
380 presence of the CMV specific pools (1µg/mL for P235 and IEDB-II, 2µg/mL for Mabtech  
381 pool), PHA (10µg/mL), or medium containing equivalent amount of DMSO in 96-well U-  
382 bottom plates. Cells were then harvested, washed with 200µl of MACS Buffer and stained

383 with a cocktail of antibodies that contained CD3-Af700 (eBioscience, clone UCHT1), CD4-  
384 BV605 (eBioscience , clone RPA-T4), CD8-PerCP-Cy5.5 (Biolegend, clone HIT8a),  
385 CD14-V500 (BD Biosciences, clone M5E2), CD19-V500 (BD Biosciences, clone HIB19),  
386 OX40-PE-Cy7 (Ber-ACT35), CD137-APC (4B4-1), and fixable viability dye-e506 for 30  
387 min at 4°C. The cells were then washed thrice with 200 µl MACS buffer, fixed using 4%  
388 PFA for 10 mins at 4°C, and resuspended in 200 µl of PBS for acquisition.

389 Cells were acquired on a BD LSRFortessa and further analysis was done on  
390 FlowJo software. As previously described (44, 72), quantification of live, singlet antigen  
391 specific CD4 T cells was determined as a percentage of their OX40+CD137+ expression  
392 (AIM+). CMV specific AIM+ CD4 T cell signals were background subtracted with their  
393 corresponding negative control DMSO samples, with a minimal DMSO level set to  
394 0.005%. The limit of detection (LOD) for the AIM+ assay was calculated by multiplying  
395 the upper confidence interval of the geometric mean of all DMSO samples by 2 (0.03).

### 396 **Statistical analysis**

397 Statistical analyses were performed using GraphPad Prism versions 8.1.1 and  
398 8.4.3. Statistical details are provided with each figure.

399

400

401

402

403

404

405

406 **Acknowledgement**

407 We would also like to thank all donors that participated in the study. We also thank the  
408 La Jolla Institute for Immunology Clinical Studies Group and Flow Cytometry Core for all  
409 the invaluable help.

410

411 **Author contribution**

412 AS and CAB conceived the study. RD and GW performed the experiments and  
413 analyzed the data. SKD performed peptide prediction, JP processed blood samples,  
414 RD, GW, and GP conducted ELISA, JS helped with the quality check of synthesized  
415 peptides, AG designed the IEDB-II pool, CLA, AS, CAB directed the study, RD, AS,  
416 CAB wrote the manuscript taking input from other authors.

417

418 **Funding**

419 This work was supported by NIH Grants AI139749 and AI101423 to C.A.B, and NIH  
420 contracts 75N93019C00065 to A.S. and 75N93019C00067 to C.L.A.

421

422 **Conflict of interest**

423 The authors declare that they have no conflict of interest.

424

425

426

427

428

429

## 430 **References**

- 431 1. Collins-McMillen D, Buehler J, Peppenelli M, Goodrum F. 2018. Molecular  
432 Determinants and the Regulation of Human Cytomegalovirus Latency and Reactivation.  
433 *Viruses* 10.
- 434 2. Hargett D, Shenk TE. 2010. Experimental human cytomegalovirus latency in CD14+  
435 monocytes. *Proc Natl Acad Sci U S A* 107:20039-44.
- 436 3. Chaturvedi S, Klein J, Vardi N, Bolovan-Fritts C, Wolf M, Du K, Mlera L, Calvert M,  
437 Moorman NJ, Goodrum F, Huang B, Weinberger LS. 2020. A molecular mechanism for  
438 probabilistic bet hedging and its role in viral latency. *Proc Natl Acad Sci U S A*  
439 117:17240-17248.
- 440 4. Davison AJ, Dolan A, Akter P, Addison C, Dargan DJ, Alcendor DJ, McGeoch DJ,  
441 Hayward GS. 2003. The human cytomegalovirus genome revisited: comparison with the  
442 chimpanzee cytomegalovirus genome. *J Gen Virol* 84:17-28.
- 443 5. Mattes FM, Vargas A, Kopycinski J, Hainsworth EG, Sweny P, Nebbia G, Bazeos A,  
444 Lowdell M, Klenerman P, Phillips RE, Griffiths PD, Emery VC. 2008. Functional  
445 impairment of cytomegalovirus specific CD8 T cells predicts high-level replication after  
446 renal transplantation. *Am J Transplant* 8:990-9.
- 447 6. Walker S, Fazou C, Crough T, Holdsworth R, Kiely P, Veale M, Bell S, Gailbraith A,  
448 McNeil K, Jones S, Khanna R. 2007. Ex vivo monitoring of human cytomegalovirus-  
449 specific CD8+ T-cell responses using QuantiFERON-CMV. *Transpl Infect Dis* 9:165-70.
- 450 7. Clarke LM, Duerr A, Feldman J, Sierra MF, Daidone BJ, Landesman SH. 1996. Factors  
451 associated with cytomegalovirus infection among human immunodeficiency virus type 1-  
452 seronegative and -seropositive women from an urban minority community. *J Infect Dis*  
453 173:77-82.
- 454 8. Doyle M, Atkins JT, Rivera-Matos IR. 1996. Congenital cytomegalovirus infection in  
455 infants infected with human immunodeficiency virus type 1. *Pediatr Infect Dis J* 15:1102-  
456 6.
- 457 9. Duryea EL, Sanchez PJ, Sheffield JS, Jackson GL, Wendel GD, McElwee BS, Boney LF,  
458 Mallory MM, Owen KE, Stehel EK. 2010. Maternal human immunodeficiency virus  
459 infection and congenital transmission of cytomegalovirus. *Pediatr Infect Dis J* 29:915-8.
- 460 10. Kovacs A, Schluchter M, Easley K, Demmler G, Shearer W, La Russa P, Pitt J, Cooper  
461 E, Goldfarb J, Hodes D, Kattan M, McIntosh K. 1999. Cytomegalovirus infection and  
462 HIV-1 disease progression in infants born to HIV-1-infected women. *Pediatric*  
463 *Pulmonary and Cardiovascular Complications of Vertically Transmitted HIV Infection*  
464 *Study Group. N Engl J Med* 341:77-84.
- 465 11. Schoenfisch AL, Dollard SC, Amin M, Gardner LI, Klein RS, Mayer K, Rompalo A,  
466 Sobel JD, Cannon MJ. 2011. Cytomegalovirus (CMV) shedding is highly correlated with  
467 markers of immunosuppression in CMV-seropositive women. *J Med Microbiol* 60:768-  
468 774.
- 469 12. Demmler-Harrison GJ. 2009. Congenital cytomegalovirus: Public health action towards  
470 awareness, prevention, and treatment. *J Clin Virol* 46 Suppl 4:S1-5.

- 471 13. Jeon J, Victor M, Adler SP, Arwady A, Demmler G, Fowler K, Goldfarb J, Keyserling H,  
472 Massoudi M, Richards K, Staras SA, Cannon MJ. 2006. Knowledge and awareness of  
473 congenital cytomegalovirus among women. *Infect Dis Obstet Gynecol* 2006:80383.
- 474 14. Fowler KB, Stagno S, Pass RF, Britt WJ, Boll TJ, Alford CA. 1992. The outcome of  
475 congenital cytomegalovirus infection in relation to maternal antibody status. *N Engl J*  
476 *Med* 326:663-7.
- 477 15. Ross SA, Fowler KB, Ashrith G, Stagno S, Britt WJ, Pass RF, Boppana SB. 2006.  
478 Hearing loss in children with congenital cytomegalovirus infection born to mothers with  
479 preexisting immunity. *J Pediatr* 148:332-6.
- 480 16. Fowler KB, Boppana SB. 2006. Congenital cytomegalovirus (CMV) infection and  
481 hearing deficit. *J Clin Virol* 35:226-31.
- 482 17. Ross SA, Boppana SB. 2005. Congenital cytomegalovirus infection: outcome and  
483 diagnosis. *Semin Pediatr Infect Dis* 16:44-9.
- 484 18. Britt WJ. 2018. Maternal Immunity and the Natural History of Congenital Human  
485 Cytomegalovirus Infection. *Viruses* 10.
- 486 19. Griffiths PD. 2002. Strategies to prevent CMV infection in the neonate. *Semin Neonatol*  
487 7:293-9.
- 488 20. Kimberlin DW, Lin CY, Sanchez PJ, Demmler GJ, Dankner W, Shelton M, Jacobs RF,  
489 Vaudry W, Pass RF, Kiell JM, Soong SJ, Whitley RJ, National Institute of A, Infectious  
490 Diseases Collaborative Antiviral Study G. 2003. Effect of ganciclovir therapy on hearing  
491 in symptomatic congenital cytomegalovirus disease involving the central nervous system:  
492 a randomized, controlled trial. *J Pediatr* 143:16-25.
- 493 21. Michaels MG, Greenberg DP, Sabo DL, Wald ER. 2003. Treatment of children with  
494 congenital cytomegalovirus infection with ganciclovir. *Pediatr Infect Dis J* 22:504-9.
- 495 22. Whitley RJ, Cloud G, Gruber W, Storch GA, Demmler GJ, Jacobs RF, Dankner W,  
496 Spector SA, Starr S, Pass RF, Stagno S, Britt WJ, Alford C, Jr., Soong S, Zhou XJ,  
497 Sherrill L, FitzGerald JM, Sommadossi JP. 1997. Ganciclovir treatment of symptomatic  
498 congenital cytomegalovirus infection: results of a phase II study. National Institute of  
499 Allergy and Infectious Diseases Collaborative Antiviral Study Group. *J Infect Dis*  
500 175:1080-6.
- 501 23. Benedict CA. 2013. A CMV vaccine: TREATing despite the TRICKs. *Expert Rev*  
502 *Vaccines* 12:1235-7.
- 503 24. Permar SR, Schleiss MR, Plotkin SA. 2018. Advancing Our Understanding of Protective  
504 Maternal Immunity as a Guide for Development of Vaccines To Reduce Congenital  
505 Cytomegalovirus Infections. *J Virol* 92.
- 506 25. Plotkin SA, Boppana SB. 2019. Vaccination against the human cytomegalovirus. *Vaccine*  
507 37:7437-7442.
- 508 26. Li CR, Greenberg PD, Gilbert MJ, Goodrich JM, Riddell SR. 1994. Recovery of HLA-  
509 restricted cytomegalovirus (CMV)-specific T-cell responses after allogeneic bone  
510 marrow transplant: correlation with CMV disease and effect of ganciclovir prophylaxis.  
511 *Blood* 83:1971-9.
- 512 27. Quinnan GV, Jr., Kirmani N, Rook AH, Manischewitz JF, Jackson L, Moreschi G,  
513 Santos GW, Saral R, Burns WH. 1982. Cytotoxic t cells in cytomegalovirus infection:  
514 HLA-restricted T-lymphocyte and non-T-lymphocyte cytotoxic responses correlate with  
515 recovery from cytomegalovirus infection in bone-marrow-transplant recipients. *N Engl J*  
516 *Med* 307:7-13.

- 517 28. Reusser P, Riddell SR, Meyers JD, Greenberg PD. 1991. Cytotoxic T-lymphocyte  
518 response to cytomegalovirus after human allogeneic bone marrow transplantation: pattern  
519 of recovery and correlation with cytomegalovirus infection and disease. *Blood* 78:1373-  
520 80.
- 521 29. Smith CJ, Quinn M, Snyder CM. 2016. CMV-Specific CD8 T Cell Differentiation and  
522 Localization: Implications for Adoptive Therapies. *Front Immunol* 7:352.
- 523 30. Sylwester AW, Mitchell BL, Edgar JB, Taormina C, Pelte C, Ruchti F, Sleath PR,  
524 Grabstein KH, Hosken NA, Kern F, Nelson JA, Picker LJ. 2005. Broadly targeted human  
525 cytomegalovirus-specific CD4+ and CD8+ T cells dominate the memory compartments  
526 of exposed subjects. *J Exp Med* 202:673-85.
- 527 31. Kern F, Bunde T, Faulhaber N, Kiecker F, Khatamzas E, Rudawski IM, Pruss A,  
528 Gratama JW, Volkmer-Engert R, Ewert R, Reinke P, Volk HD, Picker LJ. 2002.  
529 Cytomegalovirus (CMV) phosphoprotein 65 makes a large contribution to shaping the T  
530 cell repertoire in CMV-exposed individuals. *J Infect Dis* 185:1709-16.
- 531 32. Kern F, Surel IP, Faulhaber N, Frommel C, Schneider-Mergener J, Schonemann C,  
532 Reinke P, Volk HD. 1999. Target structures of the CD8(+)-T-cell response to human  
533 cytomegalovirus: the 72-kilodalton major immediate-early protein revisited. *J Virol*  
534 73:8179-84.
- 535 33. Khan N, Best D, Bruton R, Nayak L, Rickinson AB, Moss PA. 2007. T cell recognition  
536 patterns of immunodominant cytomegalovirus antigens in primary and persistent  
537 infection. *J Immunol* 178:4455-65.
- 538 34. Khan N, Cobbold M, Keenan R, Moss PA. 2002. Comparative analysis of CD8+ T cell  
539 responses against human cytomegalovirus proteins pp65 and immediate early 1 shows  
540 similarities in precursor frequency, oligoclonality, and phenotype. *J Infect Dis* 185:1025-  
541 34.
- 542 35. Elkington R, Walker S, Crough T, Menzies M, Tellam J, Bharadwaj M, Khanna R. 2003.  
543 Ex vivo profiling of CD8+-T-cell responses to human cytomegalovirus reveals broad and  
544 multispecific reactivities in healthy virus carriers. *J Virol* 77:5226-40.
- 545 36. Elkington R, Shoukry NH, Walker S, Crough T, Fazou C, Kaur A, Walker CM, Khanna  
546 R. 2004. Cross-reactive recognition of human and primate cytomegalovirus sequences by  
547 human CD4 cytotoxic T lymphocytes specific for glycoprotein B and H. *Eur J Immunol*  
548 34:3216-26.
- 549 37. Paston SJ, Dodi IA, Madrigal JA. 2004. Progress made towards the development of a  
550 CMV peptide vaccine. *Hum Immunol* 65:544-9.
- 551 38. Fuhrmann S, Streitz M, Reinke P, Volk HD, Kern F. 2008. T cell response to the  
552 cytomegalovirus major capsid protein (UL86) is dominated by helper cells with a large  
553 polyfunctional component and diverse epitope recognition. *J Infect Dis* 197:1455-8.
- 554 39. Stern-Ginossar N, Weisburd B, Michalski A, Le VT, Hein MY, Huang SX, Ma M, Shen  
555 B, Qian SB, Hengel H, Mann M, Ingolia NT, Weissman JS. 2012. Decoding human  
556 cytomegalovirus. *Science* 338:1088-93.
- 557 40. Paul S, Lindestam Arlehamn CS, Scriba TJ, Dillon MB, Oseroff C, Hinz D, McKinney  
558 DM, Carrasco Pro S, Sidney J, Peters B, Sette A. 2015. Development and validation of a  
559 broad scheme for prediction of HLA class II restricted T cell epitopes. *J Immunol*  
560 Methods 422:28-34.

- 561 41. Vita R, Mahajan S, Overton JA, Dhanda SK, Martini S, Cantrell JR, Wheeler DK, Sette  
562 A, Peters B. 2019. The Immune Epitope Database (IEDB): 2018 update. *Nucleic Acids*  
563 *Res* 47:D339-D343.
- 564 42. Bancroft T, Dillon MB, da Silva Antunes R, Paul S, Peters B, Crotty S, Lindestam  
565 Arlehamn CS, Sette A. 2016. Th1 versus Th2 T cell polarization by whole-cell and  
566 acellular childhood pertussis vaccines persists upon re-immunization in adolescence and  
567 adulthood. *Cell Immunol* 304-305:35-43.
- 568 43. da Silva Antunes R, Paul S, Sidney J, Weiskopf D, Dan JM, Phillips E, Mallal S, Crotty  
569 S, Sette A, Lindestam Arlehamn CS. 2017. Definition of Human Epitopes Recognized in  
570 Tetanus Toxoid and Development of an Assay Strategy to Detect Ex Vivo Tetanus CD4+  
571 T Cell Responses. *PLoS One* 12:e0169086.
- 572 44. Grifoni A, Weiskopf D, Ramirez SI, Mateus J, Dan JM, Moderbacher CR, Rawlings SA,  
573 Sutherland A, Premkumar L, Jadi RS, Marrama D, de Silva AM, Frazier A, Carlin AF,  
574 Greenbaum JA, Peters B, Krammer F, Smith DM, Crotty S, Sette A. 2020. Targets of T  
575 Cell Responses to SARS-CoV-2 Coronavirus in Humans with COVID-19 Disease and  
576 Unexposed Individuals. *Cell* 181:1489-1501 e15.
- 577 45. Lindestam Arlehamn CS, McKinney DM, Carpenter C, Paul S, Rozot V, Makgotlho E,  
578 Gregg Y, van Rooyen M, Ernst JD, Hatherill M, Hanekom WA, Peters B, Scriba TJ,  
579 Sette A. 2016. A Quantitative Analysis of Complexity of Human Pathogen-Specific CD4  
580 T Cell Responses in Healthy M. tuberculosis Infected South Africans. *PLoS Pathog*  
581 12:e1005760.
- 582 46. Mateus J, Grifoni A, Tarke A, Sidney J, Ramirez SI, Dan JM, Burger ZC, Rawlings SA,  
583 Smith DM, Phillips E, Mallal S, Lammers M, Rubiro P, Quiambao L, Sutherland A, Yu  
584 ED, da Silva Antunes R, Greenbaum J, Frazier A, Markmann AJ, Premkumar L, de Silva  
585 A, Peters B, Crotty S, Sette A, Weiskopf D. 2020. Selective and cross-reactive SARS-  
586 CoV-2 T cell epitopes in unexposed humans. *Science* 370:89-94.
- 587 47. Nielsen M, Justesen S, Lund O, Lundegaard C, Buus S. 2010. NetMHCIIpan-2.0 -  
588 Improved pan-specific HLA-DR predictions using a novel concurrent alignment and  
589 weight optimization training procedure. *Immunome Res* 6:9.
- 590 48. Nielsen M, Lund O. 2009. NN-align. An artificial neural network-based alignment  
591 algorithm for MHC class II peptide binding prediction. *BMC Bioinformatics* 10:296.
- 592 49. Paul S, Kolla RV, Sidney J, Weiskopf D, Fleri W, Kim Y, Peters B, Sette A. 2013.  
593 Evaluating the immunogenicity of protein drugs by applying in vitro MHC binding data  
594 and the immune epitope database and analysis resource. *Clin Dev Immunol* 2013:467852.
- 595 50. Salimi N, Fleri W, Peters B, Sette A. 2012. The immune epitope database: a historical  
596 retrospective of the first decade. *Immunology* 137:117-23.
- 597 51. Wang P, Sidney J, Kim Y, Sette A, Lund O, Nielsen M, Peters B. 2010. Peptide binding  
598 predictions for HLA DR, DP and DQ molecules. *BMC Bioinformatics* 11:568.
- 599 52. Dhanda SK, Karosiene E, Edwards L, Grifoni A, Paul S, Andreatta M, Weiskopf D,  
600 Sidney J, Nielsen M, Peters B, Sette A. 2018. Predicting HLA CD4 Immunogenicity in  
601 Human Populations. *Front Immunol* 9:1369.
- 602 53. Lim EY, Jackson SE, Wills MR. 2020. The CD4+ T Cell Response to Human  
603 Cytomegalovirus in Healthy and Immunocompromised People. *Front Cell Infect*  
604 *Microbiol* 10:202.
- 605 54. Tian Y, Seumois G, De-Oliveira-Pinto LM, Mateus J, Herrera-de la Mata S, Kim C, Hinz  
606 D, Goonawardhana NDS, de Silva AD, Premawansa S, Premawansa G, Wijewickrama A,

- 607 Balmaseda A, Grifoni A, Vijayanand P, Harris E, Peters B, Sette A, Weiskopf D. 2019.  
608 Molecular Signatures of Dengue Virus-Specific IL-10/IFN-gamma Co-producing CD4 T  
609 Cells and Their Association with Dengue Disease. *Cell Rep* 29:4482-4495 e4.
- 610 55. Wehrens EJ, Wong KA, Gupta A, Khan A, Benedict CA, Zuniga EI. 2018. IL-27  
611 regulates the number, function and cytotoxic program of antiviral CD4 T cells and  
612 promotes cytomegalovirus persistence. *PLoS One* 13:e0201249.
- 613 56. Humphreys IR, de Trez C, Kinkade A, Benedict CA, Croft M, Ware CF. 2007.  
614 Cytomegalovirus exploits IL-10-mediated immune regulation in the salivary glands. *J*  
615 *Exp Med* 204:1217-25.
- 616 57. Jackson SE, Sedikides GX, Mason GM, Okecha G, Wills MR. 2017. Human  
617 Cytomegalovirus (HCMV)-Specific CD4(+) T Cells Are Polyfunctional and Can  
618 Respond to HCMV-Infected Dendritic Cells In Vitro. *J Virol* 91.
- 619 58. Pachnio A, Ciauriz M, Begum J, Lal N, Zuo J, Beggs A, Moss P. 2016.  
620 Cytomegalovirus Infection Leads to Development of High Frequencies of Cytotoxic  
621 Virus-Specific CD4+ T Cells Targeted to Vascular Endothelium. *PLoS Pathog*  
622 12:e1005832.
- 623 59. van Leeuwen EM, Remmerswaal EB, Vossen MT, Rowshani AT, Wertheim-van Dillen  
624 PM, van Lier RA, ten Berge IJ. 2004. Emergence of a CD4+CD28- granzyme B+,  
625 cytomegalovirus-specific T cell subset after recovery of primary cytomegalovirus  
626 infection. *J Immunol* 173:1834-41.
- 627 60. Verma S, Weiskopf D, Gupta A, McDonald B, Peters B, Sette A, Benedict CA. 2016.  
628 Cytomegalovirus-Specific CD4 T Cells Are Cytolytic and Mediate Vaccine Protection. *J*  
629 *Virol* 90:650-8.
- 630 61. Erhard F, Dolken L, Schilling B, Schlosser A. 2020. Identification of the Cryptic HLA-I  
631 Immunopeptidome. *Cancer Immunol Res* 8:1018-1026.
- 632 62. Erhard F, Halenius A, Zimmermann C, L'Hernault A, Kowalewski DJ, Weekes MP,  
633 Stevanovic S, Zimmer R, Dolken L. 2018. Improved Ribo-seq enables identification of  
634 cryptic translation events. *Nat Methods* 15:363-366.
- 635 63. Laumont CM, Perreault C. 2018. Exploiting non-canonical translation to identify new  
636 targets for T cell-based cancer immunotherapy. *Cell Mol Life Sci* 75:607-621.
- 637 64. Nobre LV, Nightingale K, Ravenhill BJ, Antrobus R, Soday L, Nichols J, Davies JA,  
638 Seirafian S, Wang EC, Davison AJ, Wilkinson GW, Stanton RJ, Huttlin EL, Weekes MP.  
639 2019. Human cytomegalovirus interactome analysis identifies degradation hubs, domain  
640 associations and viral protein functions. *Elife* 8.
- 641 65. Picarda G, Benedict CA. 2018. Cytomegalovirus: Shape-Shifting the Immune System. *J*  
642 *Immunol* 200:3881-3889.
- 643 66. Deere JD, Chang WLW, Villalobos A, Schmidt KA, Deshpande A, Castillo LD, Fike J,  
644 Walter MR, Barry PA, Hartigan-O'Connor DJ. 2019. Neutralization of rhesus  
645 cytomegalovirus IL-10 reduces horizontal transmission and alters long-term immunity.  
646 *Proc Natl Acad Sci U S A* 116:13036-13041.
- 647 67. Eberhardt MK, Deshpande A, Chang WL, Barthold SW, Walter MR, Barry PA. 2013.  
648 Vaccination against a virus-encoded cytokine significantly restricts viral challenge. *J*  
649 *Virol* 87:11323-31.
- 650 68. Nguyen CC, Kamil JP. 2018. Pathogen at the Gates: Human Cytomegalovirus Entry and  
651 Cell Tropism. *Viruses* 10.



- 652 69. Vanarsdall AL, Johnson DC. 2012. Human cytomegalovirus entry into cells. *Curr Opin*  
653 *Virology* 2:37-42.
- 654 70. Gerna G, Lilleri D. 2019. Human cytomegalovirus (HCMV) infection/re-infection:  
655 development of a protective HCMV vaccine. *New Microbiol* 42:1-20.
- 656 71. Carrasco Pro S, Sidney J, Paul S, Lindestam Arlehamn C, Weiskopf D, Peters B, Sette A.  
657 2015. Automatic Generation of Validated Specific Epitope Sets. *J Immunol Res*  
658 2015:763461.
- 659 72. Dan JM, Mateus J, Kato Y, Hastie KM, Yu ED, Faliti CE, Grifoni A, Ramirez SI, Haupt  
660 S, Frazier A, Nakao C, Rayaprolu V, Rawlings SA, Peters B, Krammer F, Simon V,  
661 Saphire EO, Smith DM, Weiskopf D, Sette A, Crotty S. 2021. Immunological memory to  
662 SARS-CoV-2 assessed for up to 8 months after infection. *Science* 371.  
663

664

665

666

667

668

669 **Figures**

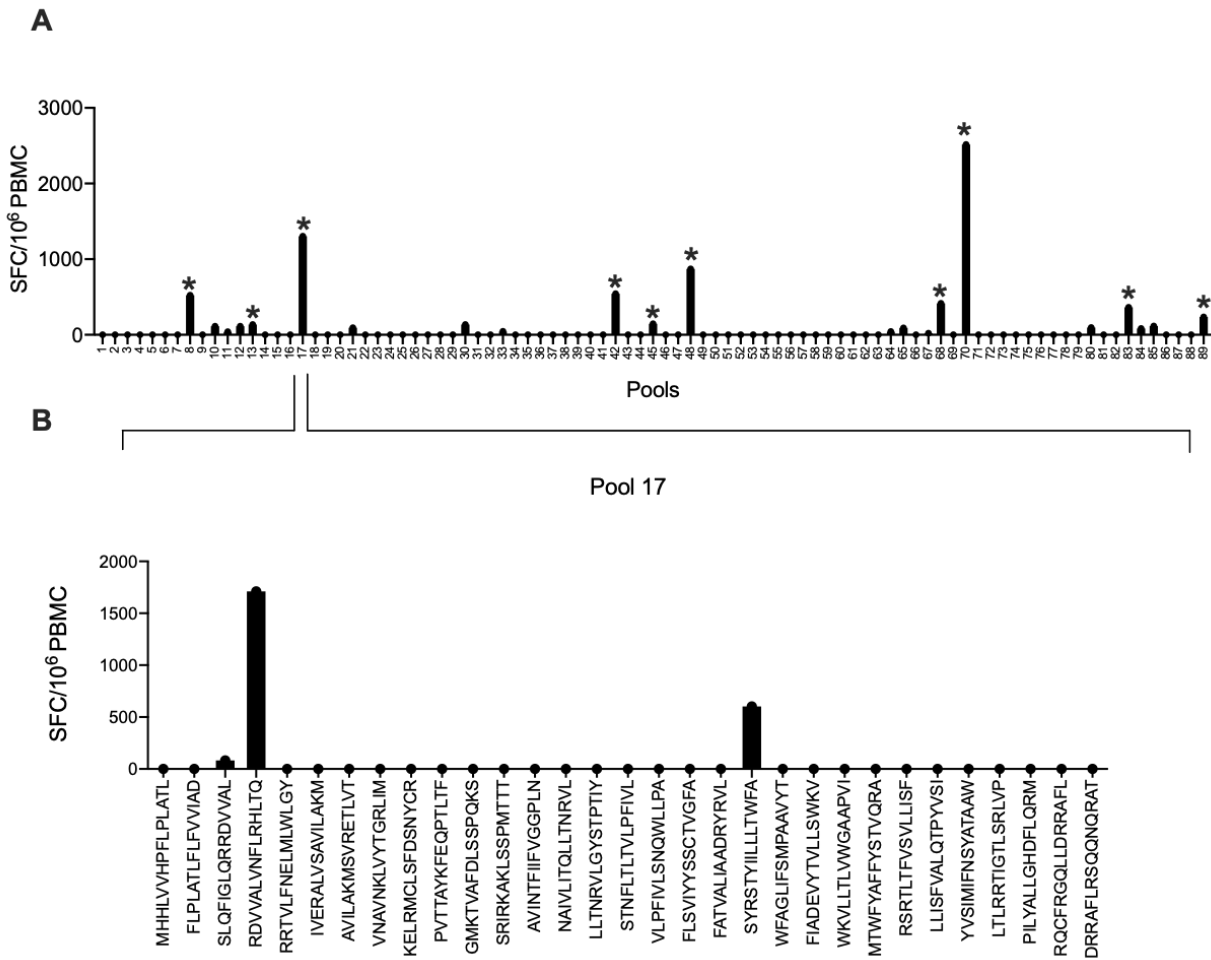

670

671 **Fig. 1 Strategy for HCMV epitope-specific T cell identification:** PBMCs from HCMV

672 seropositive subjects were stimulated with 2 µg/ml pools and plated on IFN-γ coated

673 fluorospot plates for 20 hours. The top 10 positive pools (indicated by \* on bars) were

674 deconvoluted to identify individual epitopes. PBMC were stimulated with 10 µg/ml of each

675 individual peptide contained in the pool and reactivity was measured by IFN-γ fluorospot

676 assay. (A) SFC/10<sup>6</sup> PBMC for one representative subject against the 89 peptide pools (B)

677 Deconvoluted pool representing individual peptides.

678

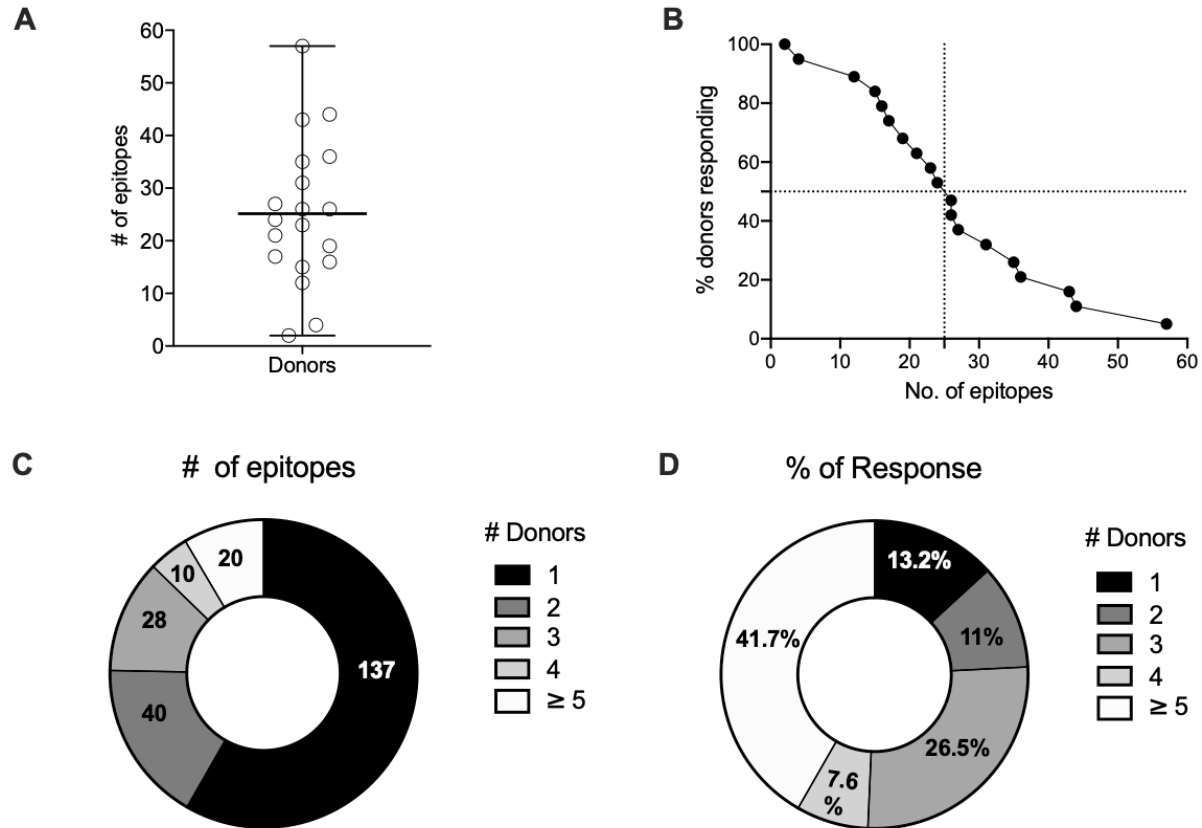

679  
680

681 **Fig. 2 Breadth and dominance of HCMV T cell responses:** (A) The number of epitopes  
682 recognized by each donor, mean  $\pm$  range. (B) Proportion of the 19 donors that responded  
683 to the indicated number of epitopes. (C) Epitopes by number of responding donors. (D)  
684 epitope % of total response by number of responding donors.

685

686

687

688

689

690

691

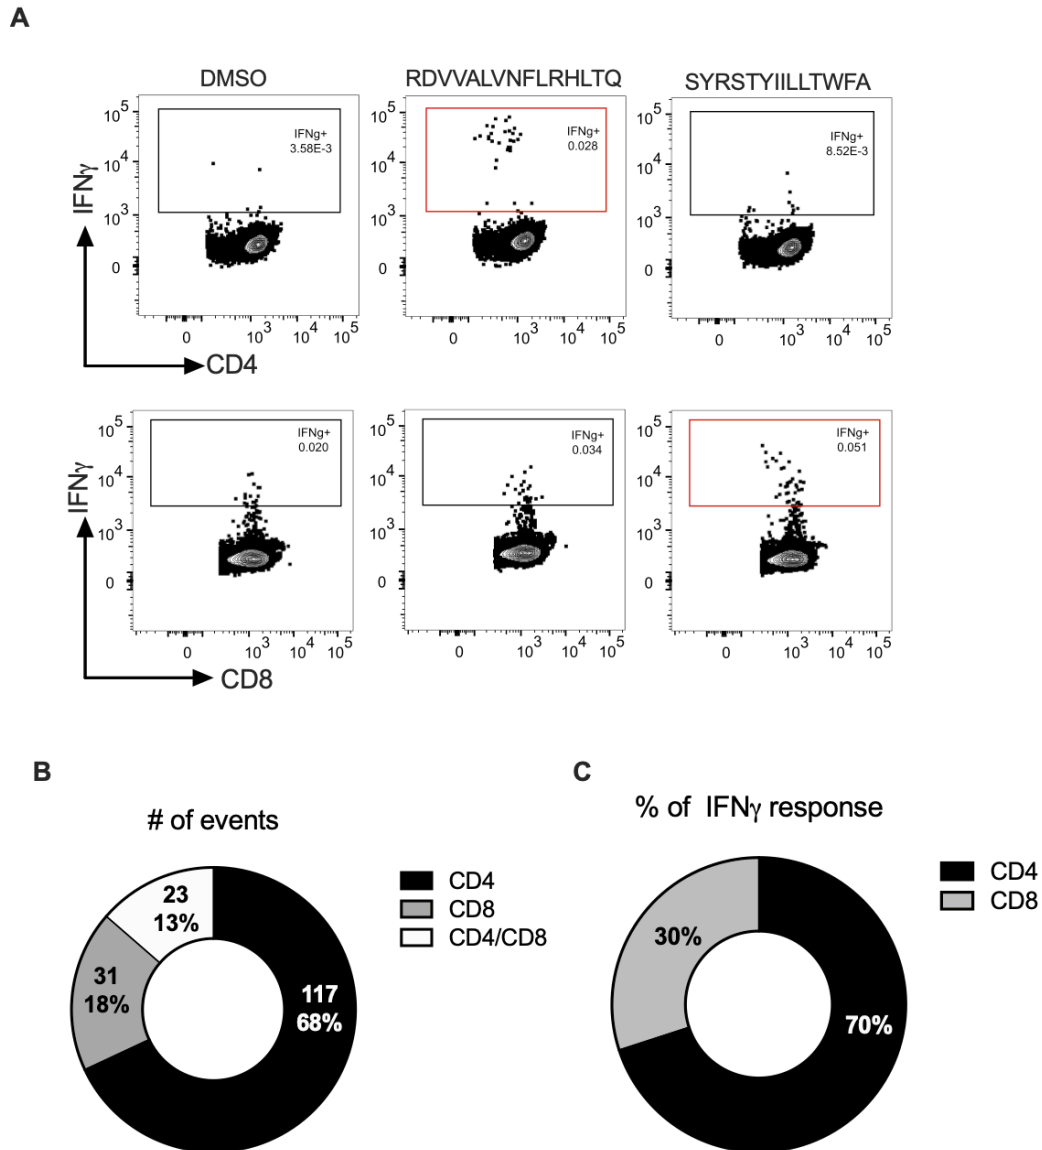

692

693 **Fig. 3 Phenotypic characterization of HCMV T cell responses:** (A) Representative  
694 FACS plots for intracellular IFN- $\gamma$  production by CD4+ and CD8+ T cells (gating axis in  
695 red) upon stimulation with two of the scoring peptide epitopes that induced them (B and  
696 C). The number of events and % response attributable to CD4+ and CD8+ T cell  
697 responses of dominant epitopes (n=58) that demonstrated response frequency of 0.15  
698 (15%) (i.e recognized by 3 or more donors).

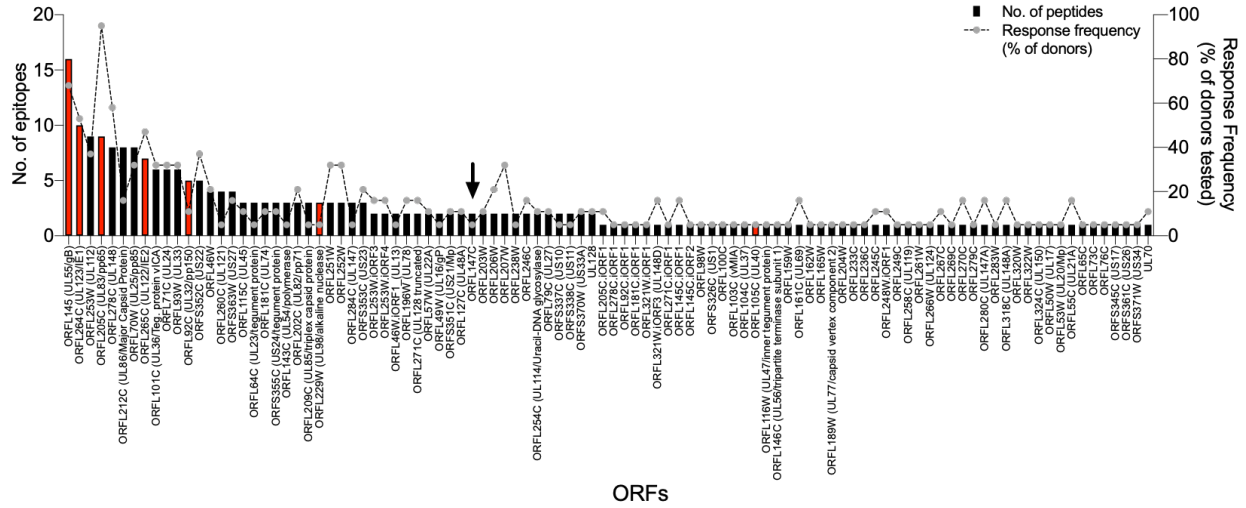

699

700 **Fig. 4 T cell epitope distribution by ORF of origin: 235 epitopes mapped to 100**

701 ORFs. Left Y axis denotes the number of epitopes associated with each ORF (bars) and  
 702 right Y axis denotes the response frequency associated with each ORF (dotted line).

703 Seven canonical ORFs that were common in IEDB and the present screen are denoted  
 704 in red. ORFL147C (arrow) is the first 'novel' ORF identified by rRNA profiling from left-  
 705 to-right, and only induces responses in 2/19 individuals tested.

706

707

708

709

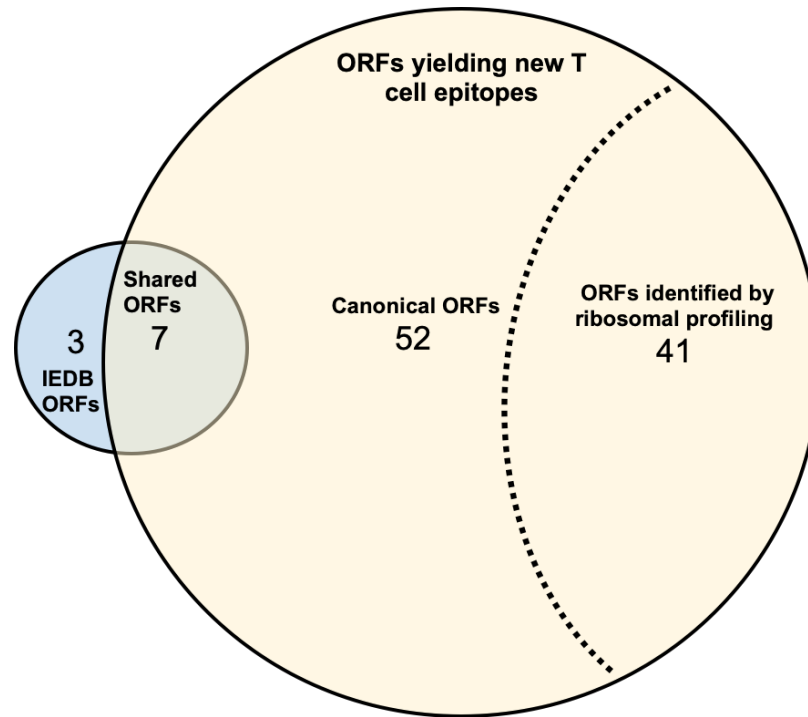

710

711 **Fig. 5 Overlap between IEDB-reported and new immunogenic ORFs identified in**  
712 **this T cell epitope screen.** New epitopes were identified in all 100 ORFs, including 7  
713 ORFs previously reported in the IEDB to be targets of T cell responses. Of the 93 ORFs  
714 found to be new targets of T cells, 52 were canonical and 41 were 'novel' as identified  
715 by recent ribosomal mRNA profiling studies.

716

717

718

719

720

721

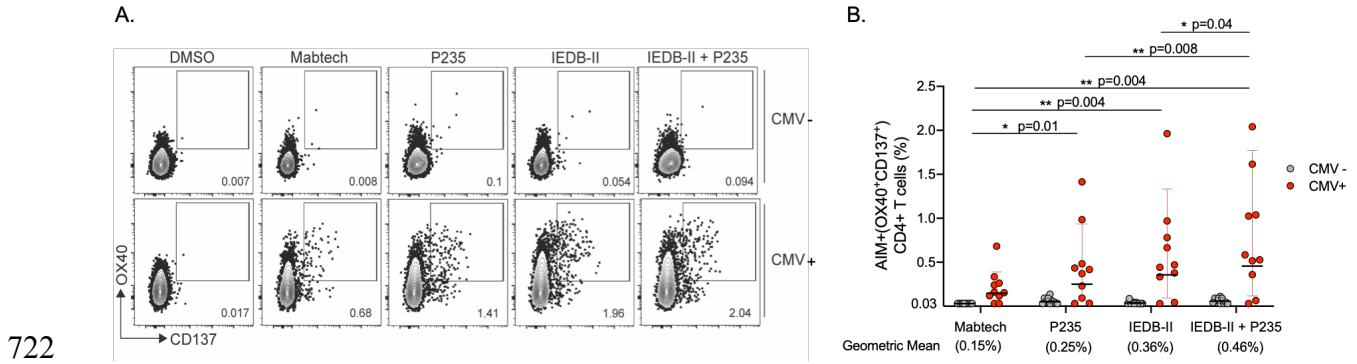

722

723 **Fig. 6 Epitope specific CD4+ T cell responses in HCMV+ and HCMV- subjects**

724 **detected with different peptide pools: (A) Representative FACS plots showing HCMV**

725 **specific CD4+ T cell reactivity against different peptide pools based on activation-induced**

726 **marker assays (OX40+ and CD137+ double expression). PBMCs from HCMV+ (red**

727 **circles) and CMV- donors (grey circles) were stimulated with 2 µg/ml of the Mabtech pool**

728 **or IEDB-II/P235 pools for 24 hrs. (B) Epitope-pool specific CD4+ T cells measured as**

729 **percentage of activation-induced marker assay positive (OX40+ CD137+) CD4+ T cells.**

730 **Each dot represents an individual subject. HCMV+ subjects demonstrated significantly**

731 **higher CD4+ T cell AIM responses than HCMV- subjects with all the different pools tested.**

732 **Mabtech HCMV+ vs HCMV- p=0.0007; P235 HCMV+ vs HCMV- p=0.0065; IEDB-II**

733 **CMV+ vs CMV- p=0.0009; P235/IEDB-II CMV+ vs CMV- p=0.004. Two-tailed Mann-**

734 **Whitney test. Comparisons across different pool formulations within the CMV+ were**

735 **made using the Wilcoxon matched-pairs signed ranked test, Two-tailed p values are**

736 **shown in the Figure; Geometric mean with geometric standard deviation.**

737

738

739

740

741 **Supplementary figures**

742

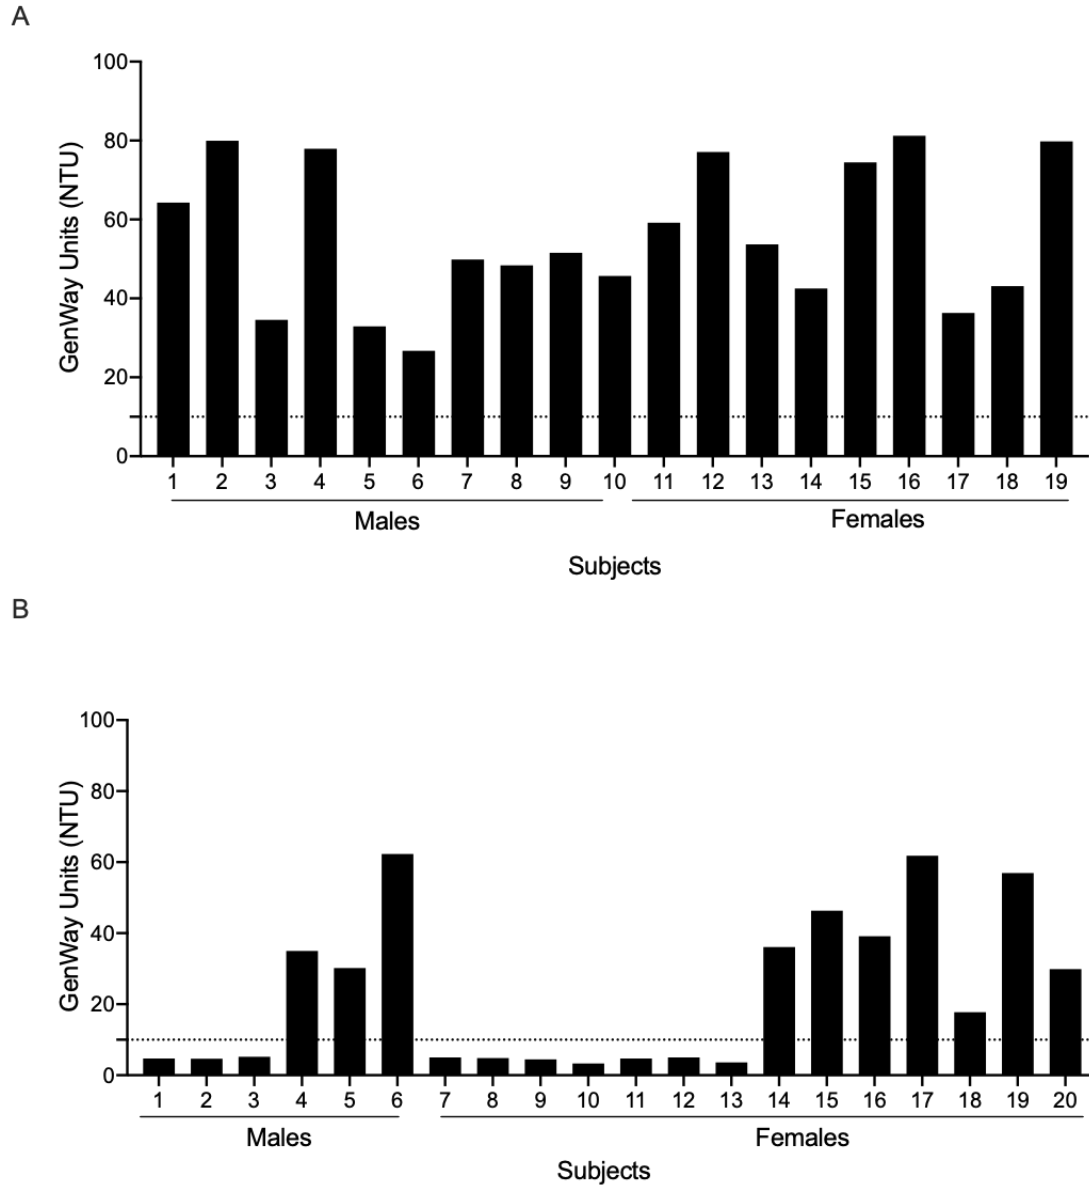

743

744 **Fig. S1 Confirmation of HCMV seropositivity in donors.** (A) IgG levels in plasma of

745 subjects in the screening cohort (n=10 males, n=9 females) and (B) the validation

746 cohort (n=13 males, n=26 females) determined by ELISA. Dotted line represents the cut

747 off for positivity (10 NTU).



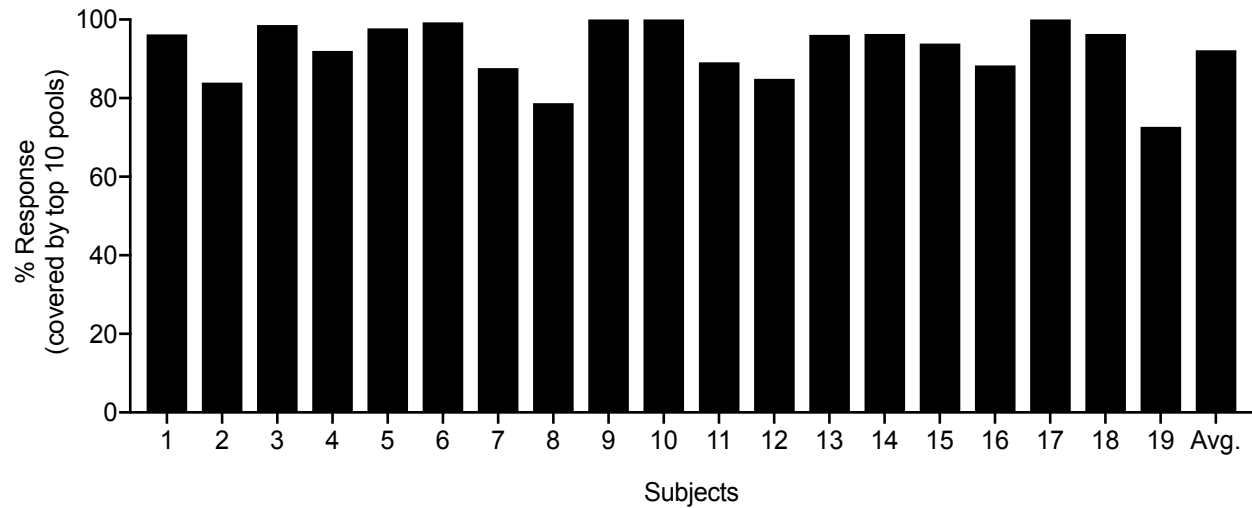

748

749 **Fig. S2 The total T cell response captured by the top 10 epitope pools in each**  
750 **subject.** The response magnitude of the top 10 pools as a percentage of the total  
751 response magnitude observed from all positive pools. On average, the top 10 pools  
752 accounted for ~90 % of each subject's total response.

753

754

755

756

757

758

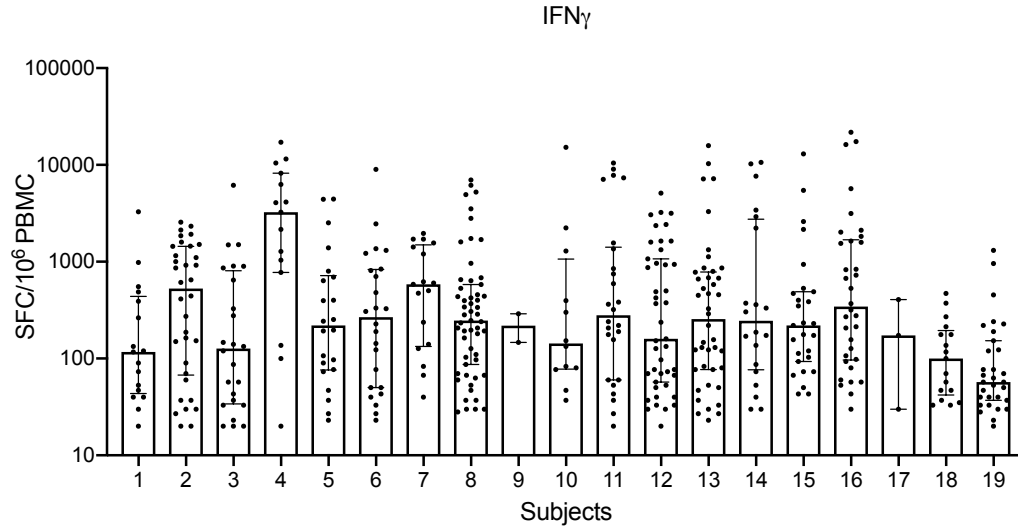

759

760 **Fig. S3 Response magnitude of each epitope identified in HCMV seropositive**  
761 **individuals:** Each dot represents an epitope. Y axis represents the response magnitude  
762 of individual epitopes. X axis represents each subject. Median  $\pm$  interquartile range is  
763 shown.

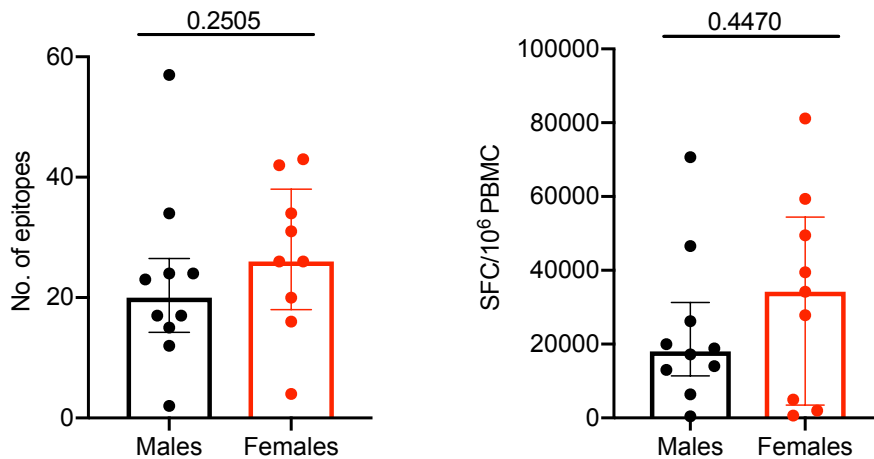

764

765 **Fig. S4 Frequency and magnitude of response in males and females:** Each dot  
766 represents a donor. Black dot/bar represents males and red dot/bar represents females.  
767 Median with interquartile range is displayed. Two-tailed Mann-Whitney test.

768

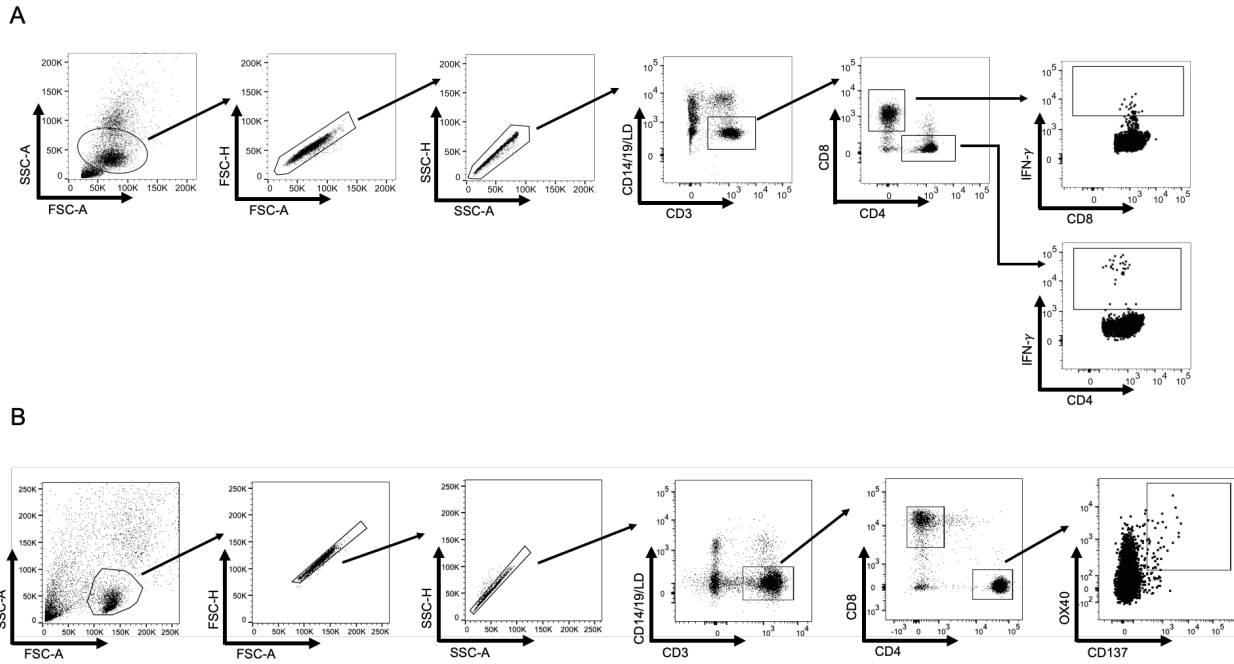

769

770 **Fig. S5 Gating strategy adopted in IFN- $\gamma$  Fluorospot and AIM assay:** (A) Human  
771 PBMCs isolated from HCMV+ subjects were stimulated with each scoring peptide to  
772 identify HCMV-specific IFN- $\gamma$  producing CD4+ and CD8+ T cells. (B) Human PBMCs  
773 isolated from HCMV+ and HCMV- subjects were stimulated with each megapool  
774 generated to identify HCMV-specific activation-induced marker assay positive (OX40+  
775 CD137+) CD4+ T cells.

776

777

778

779

780

781

782

783 **Table 1: Details of HCMV specific 235 epitopes identified in the screen.**

| S. No | Peptide sequence | Peptide length | ORF(s)                                             | No. of subjects responding | Magnitude of response |
|-------|------------------|----------------|----------------------------------------------------|----------------------------|-----------------------|
| 1     | NGIRWQYQELQYLVE  | 15             | ORFL46W,<br>ORFL46W.iORF1_(UL13),<br>ORFL46W.iORF2 | 2                          | 222                   |
| 2     | RYNALTVRSRDSLLL  | 15             | ORFL46W,<br>ORFL46W.iORF1_(UL13),<br>ORFL46W.iORF2 | 2                          | 204                   |
| 3     | RVRTWVFVQRTTLWRR | 15             | ORFL46W,<br>ORFL46W.iORF1_(UL13),<br>ORFL46W.iORF2 | 1                          | 60                    |
| 4     | GLWVSSYLVRPMTI   | 15             | ORFL46W,<br>ORFL46W.iORF1_(UL13),<br>ORFL46W.iORF2 | 2                          | 890                   |
| 5     | QGATYQLSIVRQAMQ  | 15             | ORFL46W.iORF1_(UL13)                               | 1                          | 650                   |
| 6     | GAGLRQLRQQLTVRW  | 15             | ORFL46W.iORF2                                      | 1                          | 20                    |
| 7     | MRTVPVTKLYTSRMV  | 15             | ORFL49W_(UL16)(UL16P?)                             | 1                          | 5677                  |
| 8     | AITLFFLLALRIPQ   | 15             | ORFL49W.iORF1                                      | 1                          | 207                   |
| 9     | ALFTHFVGRPRHCRL  | 15             | ORFL50W_(UL17)                                     | 1                          | 57                    |
| 10    | MLGIRAMLVMLDYYW  | 15             | ORFL53W_(UL20)                                     | 1                          | 350                   |
| 11    | PSVRMDFRARRPLRR  | 15             | ORFL55C_(UL21A)                                    | 3                          | 1740                  |
| 12    | ARRLWILSLLAVTLT  | 15             | ORFL57W_(UL22A),<br>ORFL57W.iORF1                  | 1                          | 100                   |
| 13    | LLAVTLTVALAAPSQ  | 15             | ORFL57W_(UL22A)                                    | 2                          | 6420                  |
| 14    | KDRCLVIRRRWRLVR  | 15             | ORFL64C_(UL23)                                     | 1                          | 60                    |

|    |                 |    |                                  |   |      |
|----|-----------------|----|----------------------------------|---|------|
| 15 | FVAESITEFLNIGLR | 15 | ORFL64C_(UL23)                   | 1 | 530  |
| 16 | HENGIYYGTRSMRKL | 15 | ORFL64C_(UL23),<br>ORFL64C.iORF1 | 1 | 827  |
| 17 | FCRRFFFPDRPDFFL | 15 | ORFL65C                          | 1 | 107  |
| 18 | AEDSVFTSTRARSAT | 15 | ORFL70W_(UL25)                   | 1 | 490  |
| 19 | KFVLQDFDVQHLRRL | 15 | ORFL70W_(UL25)                   | 1 | 40   |
| 20 | IINYYYVAQKKARHM | 15 | ORFL70W_(UL25)                   | 1 | 163  |
| 21 | ALALHFLTSRKGVTD | 15 | ORFL70W_(UL25)                   | 1 | 40   |
| 22 | LMITHFQRTIRVLRC | 15 | ORFL70W_(UL25)                   | 3 | 2421 |
| 23 | DFLRVVRQQDAFICT | 15 | ORFL70W_(UL25)                   | 2 | 174  |
| 24 | ICVARLQAQPSSRHI | 15 | ORFL70W_(UL25)                   | 1 | 37   |
| 25 | GVSSVTLLKIFSQVP | 15 | ORFL70W_(UL25)                   | 2 | 220  |
| 26 | VLATLAAVRTRRRSV | 15 | ORFL71C, ORFL71C.iORF1<br>(UL24) | 2 | 340  |
| 27 | EAYVRINAGQVLPVV | 15 | ORFL71C, ORFL71C.iORF1<br>(UL24) | 1 | 1853 |
| 28 | LHCMRYLTSSLVKRY | 15 | ORFL71C                          | 1 | 150  |
| 29 | KRYFRPLLRAWLGL  | 15 | ORFL71C, ORFL71C.iORF1<br>(UL24) | 4 | 1388 |
| 30 | HLLRNIKTAFGMRVL | 15 | ORFL71C, ORFL71C.iORF1<br>(UL24) | 2 | 1093 |
| 31 | ARNLMEFARVGLRAV | 15 | ORFL71C.iORF1 (UL24)             | 1 | 1450 |
| 32 | TGLVLLLLLLLVVRL | 15 | ORFL73C                          | 1 | 1440 |
| 33 | MLFRPTISNSIPRCR | 15 | ORFL76C                          | 1 | 47   |
| 34 | LRIIRLLRASIRHEY | 15 | ORFL79C_(UL27)                   | 1 | 810  |
| 35 | RAHIQKFERLHVRRF | 15 | ORFL79C_(UL27)                   | 1 | 2523 |
| 36 | SLQFIGLQRRDVAL  | 15 | ORFL92C_(UL32)                   | 1 | 83   |

|    |                 |    |                                     |   |      |
|----|-----------------|----|-------------------------------------|---|------|
| 37 | RDVVALVNFLRHLTQ | 15 | ORFL92C_(UL32)                      | 1 | 1710 |
| 38 | RRTVLFNELMLWLGY | 15 | ORFL92C_(UL32)                      | 1 | 180  |
| 39 | VNAVNKLVTGRLIM  | 15 | ORFL92C_(UL32)                      | 1 | 340  |
| 40 | KELRMCLSFDSNYCR | 15 | ORFL92C_(UL32)                      | 1 | 127  |
| 41 | GMKTVAFDLSSPQKS | 15 | ORFL92C.iORF1                       | 1 | 193  |
| 42 | NAIVLITQLLTNRVL | 15 | ORFL93W_(UL33)                      | 1 | 37   |
| 43 | STNFLTLTVLPFIVL | 15 | ORFL93W_(UL33)                      | 1 | 63   |
| 44 | VLPFIVLSNQWLLPA | 15 | ORFL93W_(UL33)                      | 1 | 247  |
| 45 | FATVALIAADRYRVL | 15 | ORFL93W_(UL33)                      | 4 | 2310 |
| 46 | SYRSTYIILLTWFA  | 15 | ORFL93W_(UL33)                      | 3 | 3990 |
| 47 | LTLRRTIGTLSRLVP | 15 | ORFL93W_(UL33)                      | 1 | 163  |
| 48 | RRRMVSVTLFSPYSV | 15 | ORFL98W.iORF1,<br>ORFL98W.iORF2     | 1 | 53   |
| 49 | GRLMEVRQRNGRLRR | 15 | ORFL100C                            | 1 | 30   |
| 50 | WPERCFIQLRSRSAL | 15 | ORFL101C,<br>ORFL101C.iORF1_(UL36)  | 3 | 313  |
| 51 | GPGFMRYQLIVLIGQ | 15 | ORFL101C,<br>ORFL101C.iORF1_(UL36)  | 1 | 3167 |
| 52 | IQTMELMIRTVPRIT | 15 | ORFL101C,<br>ORFL101C.iORF1_(UL36)  | 2 | 384  |
| 53 | EFLVRQYVLVDTFGV | 15 | ORFL101C                            | 2 | 104  |
| 54 | RREAIVRLEKTPTCQ | 15 | ORFL101C,<br>ORFL101C.iORF1_(UL36)  | 2 | 407  |
| 55 | RRRFKVCVGRRHII  | 15 | ORFL101C,<br>ORFL101C.iORF1_(UL36)  | 1 | 63   |
| 56 | RHRFLWQRRRRARLL | 15 | ORFL103C_(vMIA),<br>ORFL104C_(UL37) | 1 | 1000 |

|    |                  |    |                                    |   |       |
|----|------------------|----|------------------------------------|---|-------|
| 57 | GSFSSFYSQIARSLG  | 15 | ORFL105C_(UL40)                    | 1 | 363   |
| 58 | FLKKMLLCALKGRAS  | 15 | ORFL115C_(UL45),<br>ORFL115C.iORF1 | 1 | 930   |
| 59 | MPVQRLTVNVARCVF  | 15 | ORFL115C_(UL45)                    | 1 | 20    |
| 60 | KFIFELYRLPRLSIA  | 15 | ORFL115C_(UL45)                    | 1 | 173   |
| 61 | ASKIKMLETRVTLAL  | 15 | ORFL116W_(UL47)                    | 1 | 140   |
| 62 | ATMLSKYTRMSSLFN  | 15 | ORFL127C_(UL48A)                   | 2 | 650   |
| 63 | AFKLDLLRMIAVSRT  | 15 | ORFL127C_(UL48A)                   | 2 | 477   |
| 64 | MLFFQRYAPAFVTGY  | 15 | ORFL143C_(UL54)                    | 1 | 57    |
| 65 | DLKYILTRLEYLYKV  | 15 | ORFL143C_(UL54)                    | 1 | 30    |
| 66 | DPSYVREHGVPPIHAD | 15 | ORFL143C_(UL54)                    | 1 | 123   |
| 67 | TDLIRFERNIVCTSM  | 15 | ORFL145C_(UL55)                    | 3 | 273   |
| 68 | EGIMVVYKRNIVAHT  | 15 | ORFL145C_(UL55)                    | 1 | 637   |
| 69 | HTFKVRVYQKVLTR   | 15 | ORFL145C_(UL55)                    | 1 | 423   |
| 70 | YQKVLTFRRSYAYIH  | 15 | ORFL145C_(UL55)                    | 1 | 40    |
| 71 | RRSYAYIHTTYLLGS  | 15 | ORFL145C_(UL55)                    | 5 | 2730  |
| 72 | QLMPDDYSNTHSTRY  | 15 | ORFL145C_(UL55)                    | 5 | 45517 |
| 73 | NLNCMVTITTARSKY  | 15 | ORFL145C_(UL55)                    | 2 | 4810  |
| 74 | NADKFFIFPNYIVS   | 15 | ORFL145C_(UL55)                    | 4 | 5120  |
| 75 | GLVFWQGIKQKSLV   | 15 | ORFL145C_(UL55)                    | 1 | 53    |
| 76 | QLQFTYDTLRGYINR  | 15 | ORFL145C_(UL55)                    | 3 | 2236  |
| 77 | LRGYINRALAQIAEA  | 15 | ORFL145C_(UL55)                    | 3 | 30337 |
| 78 | KELSKINPSAISAI   | 15 | ORFL145C_(UL55)                    | 3 | 18557 |
| 79 | AILSAINKPIAARF   | 15 | ORFL145C_(UL55)                    | 5 | 11264 |
| 80 | ASCVTINQTSVKVLR  | 15 | ORFL145C_(UL55)                    | 5 | 8941  |
| 81 | YLFKRMIDLSSISTV  | 15 | ORFL145C_(UL55)                    | 1 | 67    |
| 82 | EQAYQMLLALARLDA  | 15 | ORFL145C_(UL55)                    | 4 | 21807 |

|     |                  |    |                                         |    |       |
|-----|------------------|----|-----------------------------------------|----|-------|
| 83  | LLDRLRHRKNGYRHL  | 15 | ORFL145C.iORF1                          | 3  | 12544 |
| 84  | QILWTDGLARRTRDR  | 15 | ORFL145C.iORF2                          | 1  | 37    |
| 85  | RVGITIQQLNVYHQL  | 15 | ORFL146C_(UL56)                         | 1  | 963   |
| 86  | TMRSVFEMQRIRHGA  | 15 | ORFL147C                                | 1  | 67    |
| 87  | NIFLVGFYLLVPYLG  | 15 | ORFL147C                                | 1  | 1633  |
| 88  | SLILVLLLIYRCC    | 15 | ORFL159W                                | 1  | 23    |
| 89  | LSYMKYHHLHGLPVN  | 15 | ORFL161C_(UL69)                         | 3  | 879   |
| 90  | VELCLGAGAGHVVVV  | 15 | ORFL162W                                | 1  | 383   |
| 91  | RSSWRASCVEVPKPKP | 15 | ORFL165W                                | 1  | 370   |
| 92  | MQKYFSLDNFLHDYV  | 15 | UL70                                    | 2  | 20343 |
| 93  | QTIYFLGLTALLRY   | 15 | ORFL181C_(UL74)                         | 1  | 583   |
| 94  | SFYLVNAMSRLFRV   | 15 | ORFL181C_(UL74)                         | 1  | 43    |
| 95  | TMRKLRKQALVKEQ   | 15 | ORFL181C_(UL74)                         | 1  | 1563  |
| 96  | TAVSEFMKNTHVLIR  | 15 | ORFL181C.iORF1                          | 1  | 747   |
| 97  | WREDVLMDRVVRKRYL | 15 | ORFL189W_(UL77)                         | 1  | 67    |
| 98  | IKMWFLGAPMIAVL   | 15 | ORFL196W_(UL78),<br>ORFL196W.iORF1      | 3  | 2867  |
| 99  | LFIIAFFSREPTKDL  | 15 | ORFL196W_(UL78)                         | 1  | 190   |
| 100 | PKSFTLTRIHPYIV   | 15 | ORFL202C_(UL82/pp71)                    | 2  | 340   |
| 101 | PEYIVQIQNAFETNQ  | 15 | ORFL202C_(UL82/pp71)                    | 4  | 527   |
| 102 | GALTLVIPSWHVFAS  | 15 | ORFL202C_(UL82/pp71)                    | 2  | 190   |
| 103 | CRSATSLVGNTNADV  | 15 | ORFL203W                                | 1  | 30    |
| 104 | SSCAHTTCRSATSLV  | 15 | ORFL203W                                | 2  | 104   |
| 105 | SWLGQMLRPVGLCTL  | 15 | ORFL204W                                | 1  | 43    |
| 106 | QTGIHVRVSQPSLIL  | 15 | ORFL205C_(UL83/pp65),<br>ORFL205C.iORF1 | 11 | 33563 |
| 107 | MSIYVYALPLKMLNI  | 15 | ORFL205C_(UL83/pp65)                    | 1  | 83    |



|     |                 |    |                                         |    |       |
|-----|-----------------|----|-----------------------------------------|----|-------|
| 108 | PLKMLNIPSINVHHY | 15 | ORFL205C_(UL83/pp65)                    | 7  | 2920  |
| 109 | ATKMQVIGDQYVKVY | 15 | ORFL205C_(UL83/pp65),<br>ORFL205C.iORF1 | 2  | 4637  |
| 110 | PKNMIIKPGKISHIM | 15 | ORFL205C_(UL83/pp65),<br>ORFL205C.iORF1 | 5  | 538   |
| 111 | PGKISHIMLDVAFTS | 15 | ORFL205C_(UL83/pp65),<br>ORFL205C.iORF1 | 9  | 2386  |
| 112 | MNGQQIFLEVQAIRE | 15 | ORFL205C_(UL83/pp65),<br>ORFL205C.iORF1 | 6  | 3990  |
| 113 | ELRQYDPVAALFFFD | 15 | ORFL205C_(UL83/pp65)                    | 8  | 1106  |
| 114 | GILARNLVPMVATVQ | 15 | ORFL205C_(UL83/pp65),<br>ORFL205C.iORF1 | 11 | 34633 |
| 115 | ALFFFDIDLLLQRGP | 15 | ORFL205C.iORF1                          | 2  | 73    |
| 116 | RVTGLVFSVFSVSL  | 15 | ORFL206W                                | 4  | 6380  |
| 117 | LTWCVIADRQPRFSV | 15 | ORFL206W                                | 3  | 240   |
| 118 | RPKRRVVAPFRVAAA | 15 | ORFL207W                                | 2  | 283   |
| 119 | APFRVAAAGETPLGR | 15 | ORFL207W                                | 6  | 1089  |
| 120 | IPQRLHLIKHYQLGL | 15 | ORFL209C_(UL85)                         | 1  | 437   |
| 121 | IVPMPLALEINQRLL | 15 | ORFL209C_(UL85)                         | 1  | 283   |
| 122 | LASELTMTYVRKLAL | 15 | ORFL209C_(UL85)                         | 1  | 37    |
| 123 | HSILADFNSYKAHLT | 15 | ORFL212C_(UL86) Major<br>Capsid Protein | 1  | 27    |
| 124 | FHELRTWEIMEHMRL | 15 | ORFL212C_(UL86) Major<br>Capsid Protein | 1  | 7343  |
| 125 | PQLLFHYRNLVAVLR | 15 | ORFL212C_(UL86) Major<br>Capsid Protein | 1  | 60    |

|     |                   |    |                                                                               |   |       |
|-----|-------------------|----|-------------------------------------------------------------------------------|---|-------|
| 126 | RNLVAVLRLVTRISA   | 15 | ORFL212C_(UL86) Major<br>Capsid Protein                                       | 1 | 20    |
| 127 | LFLAVQFVGEHVKVL   | 15 | ORFL212C_(UL86) Major<br>Capsid Protein                                       | 1 | 53    |
| 128 | VRVQDLFRVFP MNVY  | 15 | ORFL212C_(UL86) Major<br>Capsid Protein                                       | 1 | 43    |
| 129 | LGYN SKFYSPCAQYF  | 15 | ORFL212C_(UL86) Major<br>Capsid Protein                                       | 1 | 20    |
| 130 | TQEALPILSTTTLAL   | 15 | ORFL212C_(UL86) Major<br>Capsid Protein                                       | 1 | 407   |
| 131 | PFTVLR LSYAYRIFA  | 15 | ORFL229W_(UL98)                                                               | 1 | 33    |
| 132 | AREFLLSHDAALFRA   | 15 | ORFL229W_(UL98)                                                               | 1 | 23    |
| 133 | MLIQQYVLSQYYIKK   | 15 | ORFL229W_(UL98)                                                               | 1 | 20    |
| 134 | RLGTAATQIQKQTLY   | 15 | ORFL233C                                                                      | 1 | 30    |
| 135 | KTQIFNKLF TNRISV  | 15 | ORFL236C                                                                      | 1 | 1587  |
| 136 | VRSLAVDAQHAAKRV   | 15 | ORFL238W                                                                      | 1 | 53    |
| 137 | LEERDEWVRSLAVDA   | 15 | ORFL238W                                                                      | 1 | 47    |
| 138 | AAITVVPVITQSRLA   | 15 | ORFL245C                                                                      | 3 | 450   |
| 139 | PWYPITQARTLELTP   | 15 | ORFL246C                                                                      | 2 | 996   |
| 140 | MSTKRSTVPWYPITQ   | 15 | ORFL246C                                                                      | 3 | 477   |
| 141 | LRVTFHRVKPTLQRE   | 15 | ORFL248W.iORF1                                                                | 2 | 830   |
| 142 | SGRVILWTTLR LRCIL | 15 | ORFL249C                                                                      | 1 | 20    |
| 143 | VVRKYWTF TNP NRIL | 15 | ORFL251W, ORFL252W,<br>ORFL253W_(UL112),<br>ORFL253W.iORF1,<br>ORFL253W.iORF2 | 3 | 16876 |

|     |                 |    |                                                                               |   |       |
|-----|-----------------|----|-------------------------------------------------------------------------------|---|-------|
| 144 | TFDVRQFVFDNARLV | 15 | ORFL251W, ORFL252W,<br>ORFL253W_(UL112),<br>ORFL253W.iORF1,<br>ORFL253W.iORF2 | 6 | 13736 |
| 145 | VRGGIVFNKSVSSVV | 15 | ORFL251W, ORFL252W,<br>ORFL253W_(UL112),<br>ORFL253W.iORF1,<br>ORFL253W.iORF2 | 5 | 2691  |
| 146 | GNLQVTYVRHYLKNH | 15 | ORFL253W_(UL112),<br>ORFL253W.iORF1,<br>ORFL253W.iORF2                        | 4 | 655   |
| 147 | AVAFLNYSSSSSAVS | 15 | ORFL253W_(UL112),<br>ORFL253W.iORF1,<br>ORFL253W.iORF2                        | 3 | 2151  |
| 148 | AGLMMRMRRAPAE   | 15 | ORFL253W_(UL112)                                                              | 1 | 490   |
| 149 | CDLPLVSSRLLPETS | 15 | ORFL253W_(UL112)                                                              | 1 | 123   |
| 150 | CEIKPYVNPVATA   | 15 | ORFL253W_(UL112)                                                              | 3 | 2583  |
| 151 | DPLLRSLQVAGSGRR | 15 | ORFL253W_(UL112)                                                              | 2 | 2067  |
| 152 | LPLCSTARLRLAPRR | 15 | ORFL253W.iORF3                                                                | 1 | 467   |
| 153 | RATGNFRSTSLYAAV | 15 | ORFL253W.iORF3                                                                | 3 | 4220  |
| 154 | RCCTLRFRRCRARC  | 15 | ORFL253W.iORF4                                                                | 2 | 713   |
| 155 | MSATRHRCCTLRFR  | 15 | ORFL253W.iORF4                                                                | 1 | 277   |
| 156 | RVFCLSADWIRFLSL | 15 | ORFL254C_(UL114)                                                              | 2 | 846   |
| 157 | HLGWQTLNHHVIRRL | 15 | ORFL254C_(UL114)                                                              | 1 | 127   |
| 158 | TVVRLHVQIAGRSFT | 15 | ORFL258C_(UL119)                                                              | 1 | 213   |
| 159 | SCTHPYVSLVTPLT  | 15 | ORFL260C_(UL121)                                                              | 1 | 80    |
| 160 | ISLVTPLTINATLRL | 15 | ORFL260C_(UL121)                                                              | 1 | 317   |

|     |                 |    |                                                                                |   |       |
|-----|-----------------|----|--------------------------------------------------------------------------------|---|-------|
| 161 | CRVDADLGLLYAVCL | 15 | ORFL260C_(UL121)                                                               | 1 | 673   |
| 162 | VCLILSFSIVTAALW | 15 | ORFL260C_(UL121)                                                               | 1 | 43    |
| 163 | MFFLAIRDHDTAGGI | 15 | ORFL261W                                                                       | 1 | 1637  |
| 164 | LQTMLRKEVNSQLSL | 15 | ORFL264C_(UL123) IE1,<br>ORFL265C_(UL122) IE2                                  | 2 | 1606  |
| 165 | LVKQIKVRVDMVRHR | 15 | ORFL264C_(UL123) IE1                                                           | 3 | 580   |
| 166 | RVDMVRHRIKEHMLK | 15 | ORFL264C_(UL123) IE1                                                           | 2 | 250   |
| 167 | LRRKMMYMCYRNIEF | 15 | ORFL264C_(UL123) IE1                                                           | 6 | 1697  |
| 168 | CSPDEIMSYAQKIFK | 15 | ORFL264C_(UL123) IE1                                                           | 2 | 194   |
| 169 | EERDKVLTHIDHIFM | 15 | ORFL264C_(UL123) IE1                                                           | 2 | 107   |
| 170 | VLCCYVLEETSVMLA | 15 | ORFL264C_(UL123) IE1                                                           | 1 | 93    |
| 171 | ITKPEVISVMKRRIE | 15 | ORFL264C_(UL123) IE1                                                           | 1 | 1600  |
| 172 | FAQYILGADPLRVCS | 15 | ORFL264C_(UL123) IE1                                                           | 1 | 30    |
| 173 | EAIWAYTLATAGASS | 15 | ORFL264C_(UL123) IE1                                                           | 3 | 19333 |
| 174 | TTRPFKVIKPPVPP  | 15 | ORFL265C_(UL122) IE2                                                           | 2 | 424   |
| 175 | NKGIQIIYTRNHEVK | 15 | ORFL265C_(UL122) IE2,<br>ORFL265C.iORF1,<br>ORFL265C.iORF2,<br>ORFL265C.iORF3, | 7 | 3794  |
| 176 | LGSMCNLALSTPFLM | 15 | ORFL265C_(UL122) IE2,<br>ORFL265C.iORF1,<br>ORFL265C.iORF2                     | 4 | 668   |
| 177 | STPFLMEHTMPVTHP | 15 | ORFL265C_(UL122) IE2,<br>ORFL265C.iORF1,<br>ORFL265C.iORF2,<br>ORFL265C.iORF3, | 4 | 740   |
| 178 | YRNMIIHAATPVDLL | 15 | ORFL265C.iORF3                                                                 | 2 | 130   |

|     |                  |    |                                      |   |       |
|-----|------------------|----|--------------------------------------|---|-------|
| 179 | VMVRIFSTNQGGFML  | 15 | ORFL265C.iORF3                       | 2 | 3560  |
| 180 | VVVGIVLCLSLASTV  | 15 | ORFL266W_(UL124)                     | 1 | 1417  |
| 181 | SPVAAELPHSPAPM   | 15 | ORFL267C                             | 2 | 166   |
| 182 | SYLAVHLRISHRYH   | 15 | ORFL269C                             | 1 | 290   |
| 183 | IAITMVMRFWQYING  | 15 | ORFL270C                             | 3 | 163   |
| 184 | TALWLLLGHSRVPV   | 15 | UL128                                | 1 | 177   |
| 185 | AEIRGIVTTMTHSLT  | 15 | ORFL271C_(UL128_truncated)           | 1 | 1713  |
| 186 | NPLYLEADGRIRCGK  | 15 | ORFL271C_(UL128_truncated),<br>UL128 | 2 | 884   |
| 187 | LHRRAAVSGRRSLLQ  | 15 | ORFL271C.iORF1                       | 1 | 87    |
| 188 | MLRLLFTLVLLALYG  | 15 | ORFL278C_(UL148)                     | 3 | 4593  |
| 189 | HVRLLSYRGDPLVFK  | 15 | ORFL278C_(UL148)                     | 3 | 333   |
| 190 | VVRFALYLETLRIV   | 15 | ORFL278C_(UL148)                     | 2 | 123   |
| 191 | FYMNWTLRRSQTHYL  | 15 | ORFL278C_(UL148)                     | 6 | 16883 |
| 192 | QVEILKPRGVRHRAI  | 15 | ORFL278C_(UL148)                     | 9 | 3468  |
| 193 | FCVYRYNARLTRGYV  | 15 | ORFL278C_(UL148)                     | 3 | 700   |
| 194 | TRGYVRYTLSPKARL  | 15 | ORFL278C_(UL148)                     | 7 | 9337  |
| 195 | SLDRFIVQYLNTLLI  | 15 | ORFL278C_(UL148)                     | 8 | 23368 |
| 196 | PTWSTTVNAHNSFLH  | 15 | ORFL278C.iORF1                       | 1 | 47    |
| 197 | DRLSTLAATMCMFDY  | 15 | ORFL279C                             | 1 | 53    |
| 198 | LFYRAVALGTL SALV | 15 | ORFL280C_(UL147A)                    | 3 | 2633  |
| 199 | SSIFTSTHRGIVIVAP | 15 | ORFL283W                             | 1 | 27    |
| 200 | LSVRYLSLTAYMLLA  | 15 | ORFL284C_(UL147)                     | 1 | 1200  |
| 201 | TAYKAFLWKYAKKLN  | 15 | ORFL284C_(UL147)                     | 1 | 503   |
| 202 | WKYAKKLNHYFRLR   | 15 | ORFL284C_(UL147)                     | 1 | 237   |
| 203 | VYLWYVRRQLVAFCL  | 15 | ORFL318C_(UL148A)                    | 3 | 253   |
| 204 | FPSARDIPKQLPEQP  | 15 | ORFL320W                             | 1 | 27    |

|     |                  |    |                                            |   |       |
|-----|------------------|----|--------------------------------------------|---|-------|
| 205 | VVAYVILERLWLAAR  | 15 | ORFL321W.iORF1                             | 1 | 23    |
| 206 | IRRWWISVAIVIFIG  | 15 | ORFL321W.iORF2,<br>ORFL321W.iORF3_(UL148D) | 3 | 10480 |
| 207 | RWQFAVCAASKTATR  | 15 | ORFL322W                                   | 1 | 50    |
| 208 | PQRLLLTALAIWQRT  | 15 | ORFL324C_(UL150)                           | 1 | 983   |
| 209 | PWWRRLRVKRPKFPS  | 15 | ORFS326C,<br>ORFS326C.iORF1_(US1)          | 1 | 240   |
| 210 | LWYLGDYGAILKIYF  | 15 | ORFS337C_(US10)                            | 1 | 40    |
| 211 | LFCGACVITRSLLLI  | 15 | ORFS337C_(US10)                            | 1 | 487   |
| 212 | MNLVMLLALWAPVA   | 15 | ORFS338C_(US11)                            | 1 | 553   |
| 213 | VSEYRVEYSEARCVL  | 15 | ORFS338C_(US11)                            | 1 | 263   |
| 214 | MLVVTVFDTTRLF EI | 15 | ORFS345C_(US17)                            | 1 | 840   |
| 215 | VCAFCWLVLPHRLEQ  | 15 | ORFS351C_(US21)                            | 1 | 1960  |
| 216 | VSVLYFMPSEPGSAH  | 15 | ORFS351C.iORF2                             | 1 | 177   |
| 217 | VFQKTL SMLQGLYLR | 15 | ORFS352C_(US22)                            | 2 | 327   |
| 218 | GLYLRQYDPPALRTY  | 15 | ORFS352C_(US22)                            | 2 | 633   |
| 219 | WFLVMREQAAIPQIY  | 15 | ORFS352C_(US22)                            | 4 | 1100  |
| 220 | QIYARSLAADYLCCD  | 15 | ORFS352C_(US22)                            | 1 | 33    |
| 221 | DFRDLLNFIRQRLCC  | 15 | ORFS352C_(US22)                            | 1 | 30    |
| 222 | PSQEILLLCARHLDE  | 15 | ORFS353C_(US23)                            | 3 | 110   |
| 223 | TDCWPFEVAPAARLA  | 15 | ORFS353C_(US23)                            | 2 | 1637  |
| 224 | LFRAGLMKVYVRRRY  | 15 | ORFS353C_(US23)                            | 1 | 870   |
| 225 | VVFMGRFSRVYAYDT  | 15 | ORFS355C_(US24)                            | 1 | 70    |
| 226 | EKYMVLVSHNLDELA  | 15 | ORFS355C_(US24)                            | 1 | 20    |
| 227 | PRLHCLVTTRSSTRE  | 15 | ORFS355C.iORF1                             | 1 | 1277  |
| 228 | LRYKWLIRKDRFIVR  | 15 | ORFS361C_(US26)                            | 1 | 3247  |
| 229 | TNIMLQVSNVTNHTL  | 15 | ORFS363W_(US27)                            | 1 | 58    |

|     |                 |    |                  |   |      |
|-----|-----------------|----|------------------|---|------|
| 230 | IVVGLPFFLEYAKHH | 15 | ORFS363W_(US27)  | 2 | 1250 |
| 231 | YNRMVRFIINYVGKW | 15 | ORFS363W_(US27)  | 1 | 23   |
| 232 | ITFCLYVGQFLAYVR | 15 | ORFS363W_(US27)  | 1 | 27   |
| 233 | HDPLGLTRFIMRQLM | 15 | ORFS370W_(US33A) | 1 | 473  |
| 234 | FIMRQLMMYPLVLPF | 15 | ORFS370W_(US33A) | 1 | 530  |
| 235 | GLVYRELHDFYGYLQ | 15 | ORFS371W_(US34)  | 1 | 963  |

784

785

786

787

788

789

790

791

792

793

794

795

796

797

798

799

800

801

802 **Table 2: Details of HCMV specific class II epitopes from IEDB**

| S. No | Peptide sequence     | Peptide length | ORF                  | Antigen Name from IEDB             |
|-------|----------------------|----------------|----------------------|------------------------------------|
| 1     | HINSHSQCYSYSRVIA     | 17             | ORFL145C_(UL55)      | glycoprotein B                     |
| 2     | SRVIAGTVFVAYHRD      | 15             | ORFL145C_(UL55)      | glycoprotein B                     |
| 3     | CMVTITTARSKYPYH      | 15             | ORFL145C_(UL55)      | glycoprotein B                     |
| 4     | VFETTGGLVFWQGI       | 15             | ORFL145C_(UL55)      | glycoprotein B                     |
| 5     | MQLIPDDYSNTHSTRYVTVK | 20             | ORFL145C_(UL55)      | glycoprotein B                     |
| 6     | LPLKMLNIPSINVH       | 14             | ORFL205C_(UL83/pp65) | 65 kDa lower matrix phosphoprotein |
| 7     | PQYSEHPTFTSQYRIQ     | 16             | ORFL205C_(UL83/pp65) | 65 kDa lower matrix phosphoprotein |
| 8     | FTSQYRIQGKLEYRHT     | 16             | ORFL205C_(UL83/pp65) | 65 kDa lower matrix phosphoprotein |
| 9     | PPWQAGILARNLVPMV     | 16             | ORFL205C_(UL83/pp65) | 65 kDa lower matrix phosphoprotein |
| 10    | KYQEFFWDANDIYRIF     | 16             | ORFL205C_(UL83/pp65) | 65 kDa lower matrix phosphoprotein |
| 11    | GPISGHVLKAVFSRG      | 15             | ORFL205C_(UL83/pp65) | 65 kDa lower matrix phosphoprotein |
| 12    | LLQTGIHVRVSQPSL      | 15             | ORFL205C_(UL83/pp65) | 65 kDa lower matrix phosphoprotein |
| 13    | IYVYALPLKMLNIPS      | 15             | ORFL205C_(UL83/pp65) | 65 kDa lower matrix phosphoprotein |



|    |                 |    |                      |                                    |
|----|-----------------|----|----------------------|------------------------------------|
| 14 | LPLKMLNIPSINVHH | 15 | ORFL205C_(UL83/pp65) | 65 kDa lower matrix phosphoprotein |
| 15 | KDVALRHVVCAHELV | 15 | ORFL205C_(UL83/pp65) | 65 kDa lower matrix phosphoprotein |
| 16 | RHVVCAHELVCSMEN | 15 | ORFL205C_(UL83/pp65) | 65 kDa lower matrix phosphoprotein |
| 17 | CSMENTRATKMQVIG | 15 | ORFL205C_(UL83/pp65) | 65 kDa lower matrix phosphoprotein |
| 18 | TRATKMQVIGDQYVK | 15 | ORFL205C_(UL83/pp65) | 65 kDa lower matrix phosphoprotein |
| 19 | MQVIGDQYVKVYLES | 15 | ORFL205C_(UL83/pp65) | 65 kDa lower matrix phosphoprotein |
| 20 | VYLESFCEDVPSGKL | 15 | ORFL205C_(UL83/pp65) | 65 kDa lower matrix phosphoprotein |
| 21 | FCEDVPSGKLFMHVT | 15 | ORFL205C_(UL83/pp65) | 65 kDa lower matrix phosphoprotein |
| 22 | LGSDVEEDLTMTRNP | 15 | ORFL205C_(UL83/pp65) | 65 kDa lower matrix phosphoprotein |
| 23 | EEDLTMTRNPQPFMR | 15 | ORFL205C_(UL83/pp65) | 65 kDa lower matrix phosphoprotein |
| 24 | QPFMRPHERNGFTVL | 15 | ORFL205C_(UL83/pp65) | 65 kDa lower matrix phosphoprotein |
| 25 | KISHIMLDVAFTSHE | 15 | ORFL205C_(UL83/pp65) | 65 kDa lower matrix phosphoprotein |
| 26 | MLDVAFTSHEHFGLL | 15 | ORFL205C_(UL83/pp65) | 65 kDa lower matrix phosphoprotein |

|    |                  |    |                      |                                    |
|----|------------------|----|----------------------|------------------------------------|
| 27 | FTSHEHFGLLCPKSI  | 15 | ORFL205C_(UL83/pp65) | 65 kDa lower matrix phosphoprotein |
| 28 | PQYSEHPTFTSQYRI  | 15 | ORFL205C_(UL83/pp65) | 65 kDa lower matrix phosphoprotein |
| 29 | SQYRIQGGKLEYRHTW | 15 | ORFL205C_(UL83/pp65) | 65 kDa lower matrix phosphoprotein |
| 30 | YRHTWDRHDEGAAQG  | 15 | ORFL205C_(UL83/pp65) | 65 kDa lower matrix phosphoprotein |
| 31 | IHNPAVFTWPPWQAG  | 15 | ORFL205C_(UL83/pp65) | 65 kDa lower matrix phosphoprotein |
| 32 | PWQAGILARNLVPMV  | 15 | ORFL205C_(UL83/pp65) | 65 kDa lower matrix phosphoprotein |
| 33 | ATVQQGNLKYQEFFF  | 15 | ORFL205C_(UL83/pp65) | 65 kDa lower matrix phosphoprotein |
| 34 | QNLKYQEFFFWDANDI | 15 | ORFL205C_(UL83/pp65) | 65 kDa lower matrix phosphoprotein |
| 35 | QEFFFWDANDIYRIFA | 15 | ORFL205C_(UL83/pp65) | 65 kDa lower matrix phosphoprotein |
| 36 | ELEGVWQPAAQPKRR  | 15 | ORFL205C_(UL83/pp65) | 65 kDa lower matrix phosphoprotein |
| 37 | IFLEVQAI RETVELR | 15 | ORFL205C_(UL83/pp65) | 65 kDa lower matrix phosphoprotein |
| 38 | PPWQAGILARNLVPM  | 15 | ORFL205C_(UL83/pp65) | 65 kDa lower matrix phosphoprotein |
| 39 | DVPSGKLFMHVTLGS  | 15 | ORFL205C_(UL83/pp65) | 65 kDa lower matrix phosphoprotein |

|    |                  |    |                      |                                    |
|----|------------------|----|----------------------|------------------------------------|
| 40 | KLFMHVTLGSDVEED  | 15 | ORFL205C_(UL83/pp65) | 65 kDa lower matrix phosphoprotein |
| 41 | DVEEDLTMTRNPQPF  | 15 | ORFL205C_(UL83/pp65) | 65 kDa lower matrix phosphoprotein |
| 42 | VAFTSHEHFGLLCPK  | 15 | ORFL205C_(UL83/pp65) | 65 kDa lower matrix phosphoprotein |
| 43 | SEHPTFTSQYRIQ GK | 15 | ORFL205C_(UL83/pp65) | 65 kDa lower matrix phosphoprotein |
| 44 | LEYRHTWDRHDEGAA  | 15 | ORFL205C_(UL83/pp65) | 65 kDa lower matrix phosphoprotein |
| 45 | PLKMLNIPSINVHHY  | 15 | ORFL205C_(UL83/pp65) | 65 kDa lower matrix phosphoprotein |
| 46 | KVYLESFCEDVPSGK  | 15 | ORFL205C_(UL83/pp65) | 65 kDa lower matrix phosphoprotein |
| 47 | TLGSDVEEDLTMTRN  | 15 | ORFL205C_(UL83/pp65) | 65 kDa lower matrix phosphoprotein |
| 48 | ASTSAGRKRKSASSA  | 15 | ORFL205C_(UL83/pp65) | 65 kDa lower matrix phosphoprotein |
| 49 | ACTSGVMTRGRLKAE  | 15 | ORFL205C_(UL83/pp65) | 65 kDa lower matrix phosphoprotein |
| 50 | AGILARNLVPMVATV  | 15 | ORFL205C_(UL83/pp65) | 65 kDa lower matrix phosphoprotein |
| 51 | EPDVYYTSAFVFPTK  | 15 | ORFL205C_(UL83/pp65) | 65 kDa lower matrix phosphoprotein |
| 52 | QVIGDQYVKVYLESF  | 15 | ORFL205C_(UL83/pp65) | 65 kDa lower matrix phosphoprotein |

|    |                          |    |                      |                                    |
|----|--------------------------|----|----------------------|------------------------------------|
| 53 | FFWDANDIYRIFAEI          | 15 | ORFL205C_(UL83/pp65) | 65 kDa lower matrix phosphoprotein |
| 54 | LVSQYTPDSTPCHRG          | 15 | ORFL205C_(UL83/pp65) | 65 kDa lower matrix phosphoprotein |
| 55 | SHIMLDVAFTSHEH           | 14 | ORFL205C_(UL83/pp65) | 65 kDa lower matrix phosphoprotein |
| 56 | DESDNEIHNPVFTW           | 16 | ORFL205C_(UL83/pp65) | 65 kDa lower matrix phosphoprotein |
| 57 | SQYTPDSTPCHRG            | 13 | ORFL205C_(UL83/pp65) | 65 kDa lower matrix phosphoprotein |
| 58 | KPGKISHIMLDVA            | 13 | ORFL205C_(UL83/pp65) | 65 kDa lower matrix phosphoprotein |
| 59 | PTFTSQYRIQGKL            | 13 | ORFL205C_(UL83/pp65) | 65 kDa lower matrix phosphoprotein |
| 60 | DTPVLPHETRLQLTGIVRV      | 20 | ORFL205C_(UL83/pp65) | 65 kDa lower matrix phosphoprotein |
| 61 | INVHHYPSAAERKHRHLPVA     | 20 | ORFL205C_(UL83/pp65) | 65 kDa lower matrix phosphoprotein |
| 62 | LLQRGPQYSEHPTFT          | 15 | ORFL205C_(UL83/pp65) | 65 kDa lower matrix phosphoprotein |
| 63 | ALFFFDIDLLLQRGPQYSE      | 19 | ORFL205C_(UL83/pp65) | 65 kDa lower matrix phosphoprotein |
| 64 | DQYVKVYLESFCEDVPSGKL     | 20 | ORFL205C_(UL83/pp65) | 65 kDa lower matrix phosphoprotein |
| 65 | MTRNPQPFMRPHERNGFTV<br>L | 20 | ORFL205C_(UL83/pp65) | 65 kDa lower matrix phosphoprotein |

|    |                          |    |                      |                                    |
|----|--------------------------|----|----------------------|------------------------------------|
| 66 | MISVLGPISGHV LKAVFSRG    | 20 | ORFL205C_(UL83/pp65) | 65 kDa lower matrix phosphoprotein |
| 67 | ASGKQMWQARLTVSGLAWT<br>R | 20 | ORFL205C_(UL83/pp65) | 65 kDa lower matrix phosphoprotein |
| 68 | LPLKMLNIPSINVHHYPSAA     | 20 | ORFL205C_(UL83/pp65) | 65 kDa lower matrix phosphoprotein |
| 69 | PHETRLQLTGIVRV SQPSL     | 20 | ORFL205C_(UL83/pp65) | 65 kDa lower matrix phosphoprotein |
| 70 | IYVYALPLKMLNIPSINVHH     | 20 | ORFL205C_(UL83/pp65) | 65 kDa lower matrix phosphoprotein |
| 71 | QYDPVAALFFFDIDL LQRG     | 20 | ORFL205C_(UL83/pp65) | 65 kDa lower matrix phosphoprotein |
| 72 | RQYDPVAALFFFDIDL         | 16 | ORFL205C_(UL83/pp65) | 65 kDa lower matrix phosphoprotein |
| 73 | HETRLQLTGIVRV S          | 15 | ORFL205C_(UL83/pp65) | 65 kDa lower matrix phosphoprotein |
| 74 | VYALPLKMLNIPSIN          | 15 | ORFL205C_(UL83/pp65) | 65 kDa lower matrix phosphoprotein |
| 75 | VALRHVVCAHELVCS          | 15 | ORFL205C_(UL83/pp65) | 65 kDa lower matrix phosphoprotein |
| 76 | HIMLDVAFTSHEHFG          | 15 | ORFL205C_(UL83/pp65) | 65 kDa lower matrix phosphoprotein |
| 77 | FTSQYRIQ GKLEYRH         | 15 | ORFL205C_(UL83/pp65) | 65 kDa lower matrix phosphoprotein |
| 78 | YRIQ GKLEYRHTWDR         | 15 | ORFL205C_(UL83/pp65) | 65 kDa lower matrix phosphoprotein |

|    |                       |    |                      |                                    |
|----|-----------------------|----|----------------------|------------------------------------|
| 79 | ARNLVPMVATVQGQN       | 15 | ORFL205C_(UL83/pp65) | 65 kDa lower matrix phosphoprotein |
| 80 | ANDIYRIFAELEGVW       | 15 | ORFL205C_(UL83/pp65) | 65 kDa lower matrix phosphoprotein |
| 81 | TRQQNQWKEPDVYYT       | 15 | ORFL205C_(UL83/pp65) | 65 kDa lower matrix phosphoprotein |
| 82 | TERKTPRVTTGGGAMA      | 15 | ORFL205C_(UL83/pp65) | 65 kDa lower matrix phosphoprotein |
| 83 | NLKYQEFFFWDANDIY      | 15 | ORFL205C_(UL83/pp65) | 65 kDa lower matrix phosphoprotein |
| 84 | TPRVTTGGGAMAGAST      | 15 | ORFL205C_(UL83/pp65) | 65 kDa lower matrix phosphoprotein |
| 85 | DQYVKVYLESFCEDV       | 15 | ORFL205C_(UL83/pp65) | HCMVUL83                           |
| 86 | GKISHIMLDVAFTSH       | 15 | ORFL205C_(UL83/pp65) | HCMVUL83                           |
| 87 | EHPTFTSQYRIQGKL       | 15 | ORFL205C_(UL83/pp65) | HCMVUL83                           |
| 88 | GQNLKYQEFFFWDAND      | 15 | ORFL205C_(UL83/pp65) | HCMVUL83                           |
| 89 | KYQEFFFWDANDIYRI      | 15 | ORFL205C_(UL83/pp65) | HCMVUL83                           |
| 90 | IIPGKISHIMLDVA        | 15 | ORFL205C_(UL83/pp65) | HCMVUL83                           |
| 91 | TRATKMQVIGDQYVKVYLES  | 20 | ORFL205C_(UL83/pp65) | HCMVUL83                           |
| 92 | KLFMHVTLGSDVEEDLTMTR  | 20 | ORFL205C_(UL83/pp65) | HCMVUL83                           |
| 93 | KPGKISHIMLDVAFTSHEHF  | 20 | ORFL205C_(UL83/pp65) | HCMVUL83                           |
| 94 | LPVADAVIHASGKQMWQARL  | 20 | ORFL205C_(UL83/pp65) | HCMVUL83                           |
| 95 | GSDSDEELVTTERKTPRVTTG | 20 | ORFL205C_(UL83/pp65) | HCMVUL83                           |
| 96 | RHRQDALPGPCIASTPKKHR  | 20 | ORFL205C_(UL83/pp65) | HCMVUL83                           |
| 97 | YQEFFFWDANDIYR        | 13 | ORFL205C_(UL83/pp65) | HCMVUL83                           |
| 98 | LAWTRQQNQWKEPDV       | 15 | ORFL205C_(UL83/pp65) | HCMVUL83                           |
| 99 | YQEFFFWDANDIYRIF      | 15 | ORFL205C_(UL83/pp65) | HCMVUL83                           |

|     |                     |    |                      |                                         |
|-----|---------------------|----|----------------------|-----------------------------------------|
| 100 | EFFWDANDIYRIF       | 13 | ORFL205C_(UL83/pp65) | HCMVUL83                                |
| 101 | VEEDLTMTRNPQPFM     | 15 | ORFL205C_(UL83/pp65) | HCMVUL83                                |
| 102 | KPGKISHIMLDVAFTSH   | 17 | ORFL205C_(UL83/pp65) | HCMVUL83                                |
| 103 | TSQYRIQGKLEYRHT     | 15 | ORFL205C_(UL83/pp65) | HCMVUL83                                |
| 104 | MSIYVYALPLKMLNI     | 15 | ORFL205C_(UL83/pp65) | HCMVUL83                                |
| 105 | VYYTSAFVFPTKDVA     | 15 | ORFL205C_(UL83/pp65) | HCMVUL83                                |
| 106 | LRQYDPVAALFFFDI     | 15 | ORFL205C_(UL83/pp65) | HCMVUL83                                |
| 107 | GPQYSEHPTFTSQYRI    | 16 | ORFL205C_(UL83/pp65) | HCMVUL83                                |
| 108 | HPTFTSQYRIQGKLE     | 15 | ORFL205C_(UL83/pp65) | HCMVUL83                                |
| 109 | TRLLQTGIHVRVSQP     | 15 | ORFL205C_(UL83/pp65) | HCMVUL83                                |
| 110 | RNGFTVLCPKNMIK      | 15 | ORFL205C_(UL83/pp65) | HCMVUL83                                |
| 111 | PISGHVLKAVFSRGD     | 15 | ORFL205C_(UL83/pp65) | HCMVUL83                                |
| 112 | GIHVRVSQPSLILVS     | 15 | ORFL205C_(UL83/pp65) | HCMVUL83                                |
| 113 | IHASGKQMWQARLTV     | 15 | ORFL205C_(UL83/pp65) | HCMVUL83                                |
| 114 | GKQMWQARLTVSGLA     | 15 | ORFL205C_(UL83/pp65) | HCMVUL83                                |
| 115 | ENTRATKMQVIGDQY     | 15 | ORFL205C_(UL83/pp65) | HCMVUL83                                |
| 116 | ATKMVIGDQYVKVY      | 15 | ORFL205C_(UL83/pp65) | HCMVUL83                                |
| 117 | RIPHERNGFTVLCPKN    | 15 | ORFL205C_(UL83/pp65) | HCMVUL83                                |
| 118 | AQGDDVWTSGSDSD      | 15 | ORFL205C_(UL83/pp65) | HCMVUL83                                |
| 119 | SSATACTSGVMTRGR     | 15 | ORFL205C_(UL83/pp65) | HCMVUL83                                |
| 120 | YRIFAELEGVWQPAA     | 15 | ORFL205C_(UL83/pp65) | HCMVUL83                                |
| 121 | AELEGVWQPAAQPKR     | 15 | ORFL205C_(UL83/pp65) | HCMVUL83                                |
| 122 | AVFSRGDTPVLPHEH     | 15 | ORFL205C_(UL83/pp65) | phosphorylated matrix protein<br>(pp65) |
| 123 | ALPLKMLNIPSINVH     | 15 | ORFL205C_(UL83/pp65) | pp65                                    |
| 124 | HVLKAVFSRGDTPVL     | 15 | ORFL205C_(UL83/pp65) | pp65                                    |
| 125 | AHELVCSMENTRATKMVIG | 20 | ORFL205C_(UL83/pp65) | tegument protein pp65                   |

|     |                      |    |                      |                                  |
|-----|----------------------|----|----------------------|----------------------------------|
| 126 | FCEDVPSGKLFMHVTLGSDV | 20 | ORFL205C_(UL83/pp65) | tegument protein pp65            |
| 127 | TLGSDVEEDLTMTRNPQPF  | 19 | ORFL205C_(UL83/pp65) | tegument protein pp65            |
| 128 | LLQTGIHVRVVSQPSLILV  | 18 | ORFL205C_(UL83/pp65) | tegument protein pp65            |
| 129 | SICPSQEPMSIYVYA      | 15 | ORFL205C_(UL83/pp65) | tegument protein pp65            |
| 130 | SQEPMSIYVYALPLK      | 15 | ORFL205C_(UL83/pp65) | tegument protein pp65            |
| 131 | LNIPSINVHHYPSAA      | 15 | ORFL205C_(UL83/pp65) | tegument protein pp65            |
| 132 | HDVSKGDDNKLGGALQAKA  | 19 | ORFL264C_(UL123) IE1 | 55 kDa immediate-early protein 1 |
| 133 | ALQAKARDKKDELRRKMMY  | 19 | ORFL264C_(UL123) IE1 | 55 kDa immediate-early protein 1 |
| 134 | KEHMLKKYTQTEEFK      | 15 | ORFL264C_(UL123) IE1 | 55 kDa immediate-early protein 1 |
| 135 | QTEEFKFTGAFNMMGGCLQN | 19 | ORFL264C_(UL123) IE1 | 55 kDa immediate-early protein 1 |
| 136 | MGGCLQNALDILDKVHEPFE | 20 | ORFL264C_(UL123) IE1 | 55 kDa immediate-early protein 1 |
| 137 | AIVAYTLATAGVSSDSLIV  | 19 | ORFL264C_(UL123) IE1 | 55 kDa immediate-early protein 1 |
| 138 | TMQSMYENYIVPEDKREMW  | 19 | ORFL264C_(UL123) IE1 | 55 kDa immediate-early protein 1 |
| 139 | RRKMMYMCYRNIEFFTKNS  | 19 | ORFL264C_(UL123) IE1 | 55 kDa immediate-early protein 1 |
| 140 | FFTKNSAFPKTNGCSQAM   | 19 | ORFL264C_(UL123) IE1 | 55 kDa immediate-early protein 1 |
| 141 | CVETMCNEYKVTSDACMMT  | 19 | ORFL264C_(UL123) IE1 | 55 kDa immediate-early protein 1 |



|     |                      |    |                      |                                  |
|-----|----------------------|----|----------------------|----------------------------------|
| 142 | DACMMTMYGGASLLSEFCR  | 19 | ORFL264C_(UL123) IE1 | 55 kDa immediate-early protein 1 |
| 143 | NYIVPEDKREMWMACIKELH | 20 | ORFL264C_(UL123) IE1 | 55 kDa immediate-early protein 1 |
| 144 | VRHRIKEHMLKKYTQTEEF  | 20 | ORFL264C_(UL123) IE1 | 55 kDa immediate-early protein 1 |
| 145 | VRVDMVRHRIKEHML      | 15 | ORFL264C_(UL123) IE1 | 55 kDa immediate-early protein 1 |
| 146 | VKQIKVRVDMVRHRI      | 15 | ORFL264C_(UL123) IE1 | 55 kDa immediate-early protein 1 |
| 147 | VRHRIKEHMLKKYTQ      | 15 | ORFL264C_(UL123) IE1 | 55 kDa immediate-early protein 1 |
| 148 | EQSDEEEEEGAQEER      | 15 | ORFL264C_(UL123) IE1 | 55 kDa immediate-early protein 1 |
| 149 | VKSEPVSEIEEVAPE      | 15 | ORFL264C_(UL123) IE1 | 55 kDa immediate-early protein 1 |
| 150 | PVSEIEEVAPEEEEEED    | 15 | ORFL264C_(UL123) IE1 | 55 kDa immediate-early protein 1 |
| 151 | LQNALDILDKVHEPF      | 15 | ORFL264C_(UL123) IE1 | 55 kDa immediate-early protein 1 |
| 152 | EDKREMWMACIKELH      | 15 | ORFL264C_(UL123) IE1 | 55 kDa immediate-early protein 1 |
| 153 | THIDHIFMDILTTCV      | 15 | ORFL264C_(UL123) IE1 | 55 kDa immediate-early protein 1 |
| 154 | VLEETSVMLAKRPLI      | 15 | ORFL264C_(UL123) IE1 | 55 kDa immediate-early protein 1 |

|     |                           |    |                      |                                  |
|-----|---------------------------|----|----------------------|----------------------------------|
| 155 | TKPEVISVMKRRIEE           | 15 | ORFL264C_(UL123) IE1 | 55 kDa immediate-early protein 1 |
| 156 | RRIEEICMKVFAQYI           | 15 | ORFL264C_(UL123) IE1 | 55 kDa immediate-early protein 1 |
| 157 | NIEFFTKNSAFP KTT          | 15 | ORFL264C_(UL123) IE1 | regulatory protein IE1           |
| 158 | LTHIDHIFMDILTTCVETM       | 19 | ORFL264C_(UL123) IE1 | regulatory protein IE1           |
| 159 | AIVAYTLATAGASSDSL V       | 19 | ORFL264C_(UL123) IE1 | UL123; IE1                       |
| 160 | VRVDMVRHRIKEHMLK KYTQ     | 20 | ORFL264C_(UL123) IE1 | UL123; IE1                       |
| 161 | DKREMWMACIKELH            | 14 | ORFL264C_(UL123) IE1 | UL123; IE1                       |
| 162 | QSMYENYIVPEDKREM WMA<br>C | 20 | ORFL264C_(UL123) IE1 | UL123; IE1                       |
| 163 | TRRGRVKIDEVSRMF           | 15 | ORFL265C_(UL122) IE2 | 45 kDa immediate-early protein 2 |
| 164 | GDILAQAVNHAGIDS           | 15 | ORFL265C_(UL122) IE2 | 45 kDa immediate-early protein 2 |
| 165 | KTTRPFKVIKPPVP            | 15 | ORFL265C_(UL122) IE2 | 45 kDa immediate-early protein 2 |
| 166 | FKVIKPPVPPAPIM            | 15 | ORFL265C_(UL122) IE2 | 45 kDa immediate-early protein 2 |
| 167 | PEPDFTIQYRNKIID           | 15 | ORFL265C_(UL122) IE2 | 45 kDa immediate-early protein 2 |
| 168 | PFTIPSMHQVLDEAI           | 15 | ORFL265C_(UL122) IE2 | 45 kDa immediate-early protein 2 |
| 169 | LMQKFQVMVRIFS             | 15 | ORFL265C_(UL122) IE2 | 45 kDa immediate-early protein 2 |
| 170 | VRIFSTNQGGFMLPI           | 15 | ORFL265C_(UL122) IE2 | 45 kDa immediate-early protein 2 |

|     |                       |    |                      |                                     |
|-----|-----------------------|----|----------------------|-------------------------------------|
| 171 | PEDLDTLSLAIEAAI       | 15 | ORFL265C_(UL122) IE2 | 45 kDa immediate-early protein 2    |
| 172 | TLSLAIEAAIQDLRN       | 15 | ORFL265C_(UL122) IE2 | 45 kDa immediate-early protein 2    |
| 173 | SMHQVLDEAIKACKT       | 15 | ORFL265C_(UL122) IE2 | 45 kDa immediate-early protein 2    |
| 174 | KGIQIYTRNHEVKS        | 15 | ORFL265C_(UL122) IE2 | 45 kDa immediate-early protein 2    |
| 175 | ALSTPFLMEHTMPVT       | 15 | ORFL265C_(UL122) IE2 | 45 kDa immediate-early protein 2    |
| 176 | FLMEHTMPVTHPPEV       | 15 | ORFL265C_(UL122) IE2 | 45 kDa immediate-early protein 2    |
| 177 | PYAVAFQPLLAYAY        | 14 | UL57                 | single-stranded DNA-binding protein |
| 178 | KTQLNRHSYLKDSDFLDAA   | 19 | UL75                 | envelope glycoprotein H             |
| 179 | RQTEKHELLVLVKKKAQLNRH | 20 | UL75                 | Glycoprotein H precursor            |
| 180 | LDPHAFHLLLNTYGRPIR    | 18 | UL75                 | Glycoprotein H precursor            |
| 181 | KAQLNRHSYLKDSDFLDAA   | 19 | UL75                 | Glycoprotein H precursor            |
| 182 | DVLKSGRCQMLDRRTVEMA   | 19 | UL75                 | Glycoprotein H precursor            |
| 183 | LDKAFHLLLNTYGRPIR     | 17 | UL75                 | Glycoprotein H precursor            |
| 184 | KDQLNRHSYLKDPDFLDAA   | 19 | UL75                 | Glycoprotein H precursor            |
| 185 | SYLKDSDFLDAAL         | 13 | UL75                 | HCMVUL75                            |
| 186 | RRIPHFYRVRREVPRTVNE   | 19 | UL86                 | Major capsid protein                |
| 187 | MDVNYFKIPNNPRGRASC    | 19 | UL86                 | Major capsid protein                |

803

804

805

806 **Table 3: Demographic characteristics of HCMV (+/-) subjects analyzed in**  
 807 **screening and validation studies.**

808

| <b>Characteristics</b>         | <i>Screening cohort</i> | <i>Validation cohort</i> |                     |
|--------------------------------|-------------------------|--------------------------|---------------------|
|                                | <b>HCMV+</b>            | <b>HCMV+</b>             | <b>HCMV-</b><br>810 |
| Total participants enrolled, n | 19                      | 10                       | 10 811              |
| Males/females                  | 10/9                    | 3/7                      | 3/7 812             |
| Median age (range)             | 65 (28-80)              | 35.5 (22-55)             | 28.5 (19-42) 813    |
| Caucasian, % (n)               | 68 (13)                 | 40 (4)                   | 40 (4) 814          |
| Asian, % (n)                   | 16 (3)                  | 10 (1)                   | 20 (2) 815          |
| African American, % (n)        | 5 (1)                   | 10 (1)                   | 10 (1) 816<br>817   |
| More than one race, % (n)      | 0 (0)                   | 30 (3)                   | 30 (3) 818          |
| Unknown, % (n)                 | 10 (2)                  | 10 (1)                   | 0 (0)               |
